# Supplementary material
Source: PubMed Central journal article supplement (PMC5336393)
Supplement: NIHMS308800-supplement-Supplemental_data.pdf [file NIHMS308800-supplement-Supplemental_data.pdf]

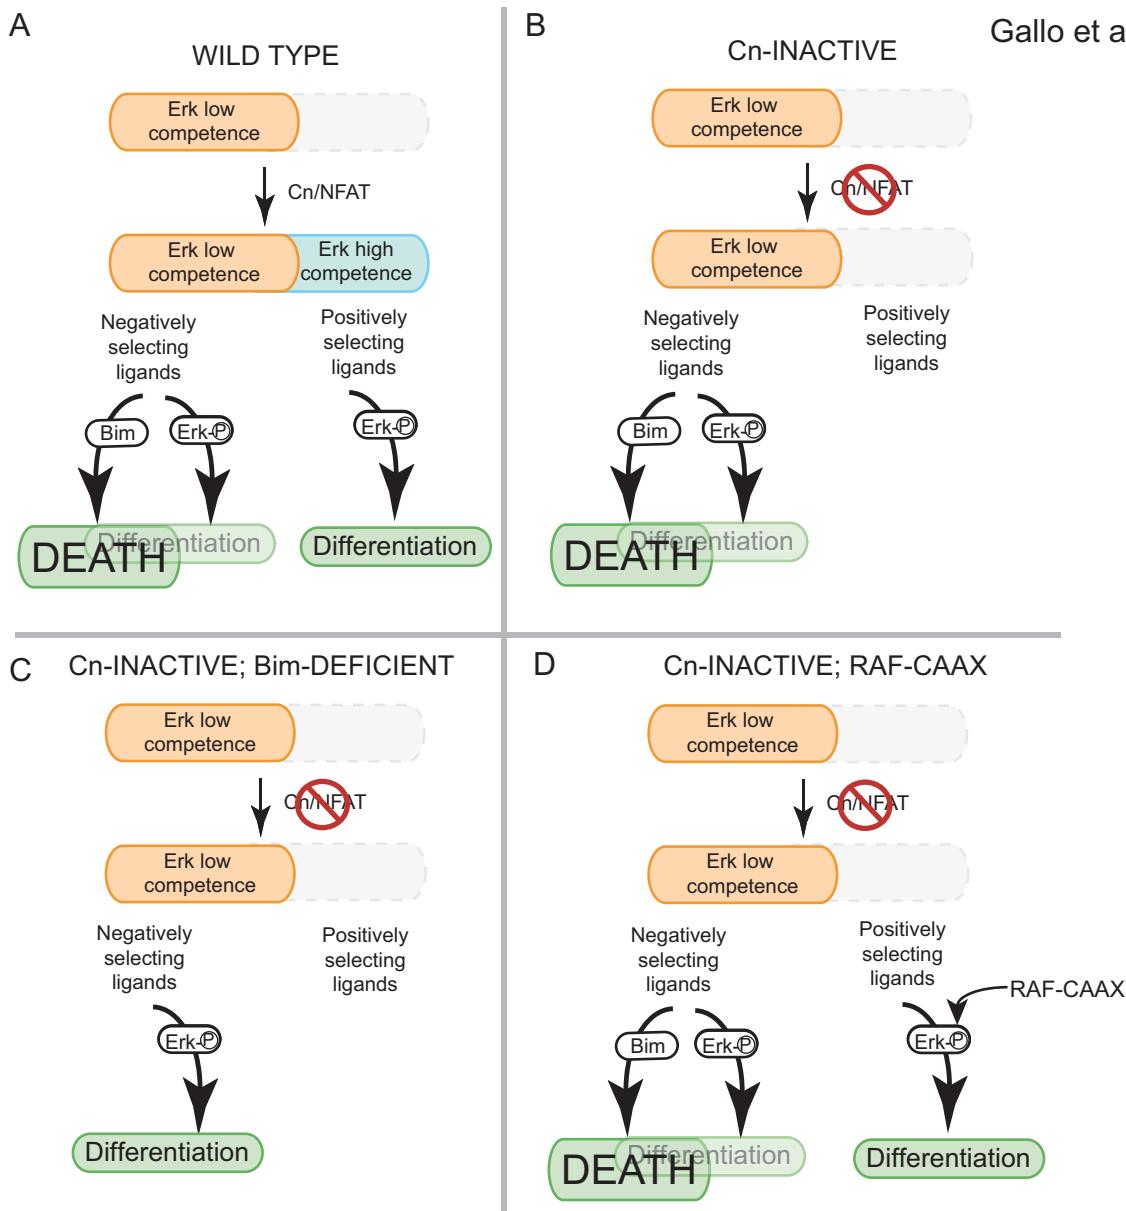

### Supplementary Figure 1

#### Calcineurin is required for development of cellular competency for activation of Erk in response to positive selecting signals.

DP thymocytes transition from a state in which they are unable to efficiently activate Erk, the “Erk low competence” state, to a state in which they are competent to activate Erk in response to positively selecting signals, the “Erk high competence” state. Development of the “Erk high competence” population requires calcineurin and NFAT (Cn/NFAT) activity. A) In wild-type thymocytes, negatively selecting signals activate both the Erk pathway and the Bim pathway. Bim induces death by apoptosis, which is dominant over differentiation. Positively selecting ligands activate the Erk pathway but do not activate Bim, resulting in differentiation. B) In the absence of Cn/NFAT activity, thymocytes are blocked in the “Erk low competence” state. In this state, they fail to activate Erk in response to positively selecting ligands; however they are still able to respond to negatively selecting signals by activating the Erk and Bim pathway. C) When apoptosis is circumvented by deletion of Bim, thymocytes that are blocked in the “Erk low competency” state are allowed to differentiate in response to negatively selecting ligands. D) Differentiation of thymocytes that are blocked in the “Erk low competency” state can be partially rescued by transgenic expression of constitutively active Raf-1 mutant.

a Cnb1-deficiency does not affect calcium influx in thymocytes activated with anti-CD3

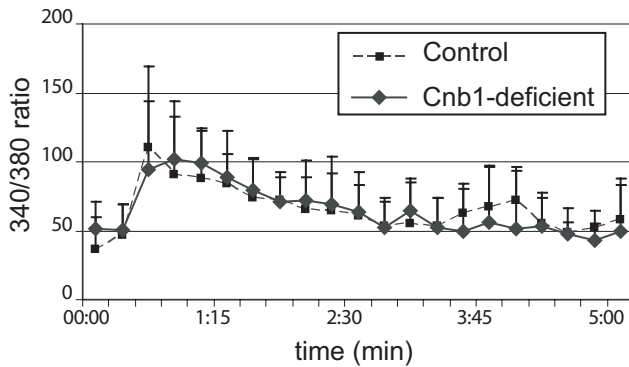

b Normal TCR-dependent actin polymerization in Cnb1-deficient thymocytes

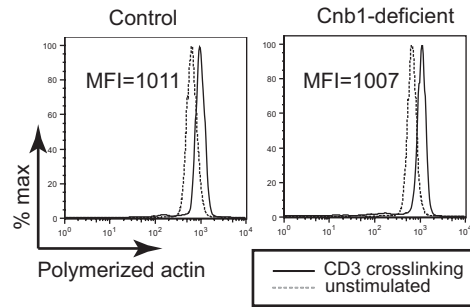

## Supplementary Figure 2

### Normal TCR-dependent calcium flux and actin polymerization in Cnb1-deficient thymocytes.

Thymocytes were pulsed for 30 min with 5 $\mu$ g/ml of fura-2-AM (Molecular Probes) at 37°C, washed once and then allowed to fall on anti-CD3 $\epsilon$  (20 $\mu$ g/ml) coated chambers. The instant when the cell touched the plate was considered time zero. At the end of the observation period, fluorophore conjugated anti-CD4 and anti-CD8 antibodies were added to the chamber without dislocating the cells. Only thymocytes that stained positive for CD4 and CD8 were used for analysis. The ratio of the fura-2 emission at 510 nm resulting from 340 nm and 380 nm excitation was determined to quantify the relative intracellular calcium concentration. Data acquisition and analysis were done in Metamorph (Universal Imaging) (n=5, mean + s.d.).b) Actin polymerization in Cnb1-deficient and control DP thymocytes after 5 min of CD3 $\epsilon$  crosslinking as assayed by FITC-phalloidin staining (Molecular Probes). MFI, Median fluorescence intensity.

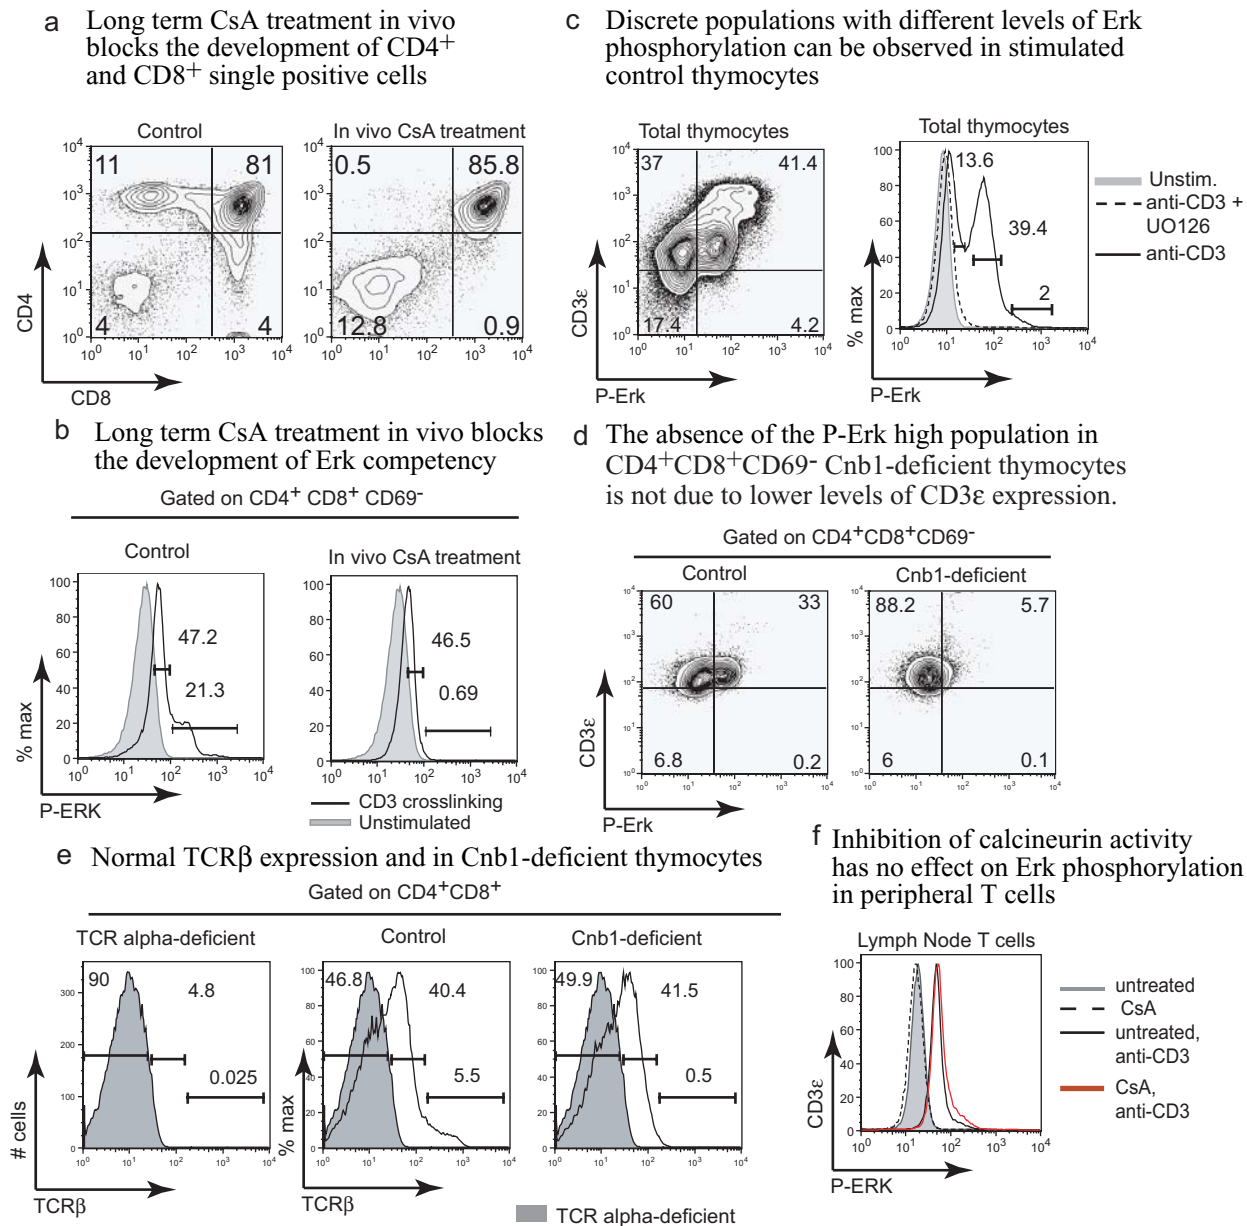

### Supplementary Figure 3

#### Effects of long term calcineurin inhibition on positive selection and Erk phosphorylation

a) Mice were treated with CsA (30mg/Kg/day, i.p.) for 10 days or left untreated. CsA treatment completely blocks development of single positive thymocytes. b) Erk phosphorylation was assayed by intracellular staining and flow cytometry upon CD3ε crosslinking (2 min) in thymocytes from CsA treated and control mice. CsA treatment blocks the development of the “high Erk competence” thymocyte population. c) Erk phosphorylation in Cnb1-deficient and control thymocytes was assayed as in b). The MEK inhibitor UO126 (10μM) shows specificity of the staining. The levels of cross-linked CD3ε were measured with an anti-goat antibody, which recognizes the antibody used for crosslinking. Three peaks of Erk phosphorylation were observed in control thymocytes, the highest of which corresponds to positively selected SP thymocytes, which also express higher levels of CD3ε. d) The absence of the P-Erk high population in Cnb1-deficient CD4<sup>+</sup>CD8<sup>+</sup>CD69<sup>-</sup> thymocytes is not due to lower levels of CD3ε crosslinking. e) The percentage of DP TCRβ<sup>int</sup> pre-selection thymocytes is not affected by Cnb1-deficiency. f) Inhibition of calcineurin activity has no effect on peripheral T cells Erk phosphorylation.

a Canonical MHC-TCR interaction is not required for development of Erk competency

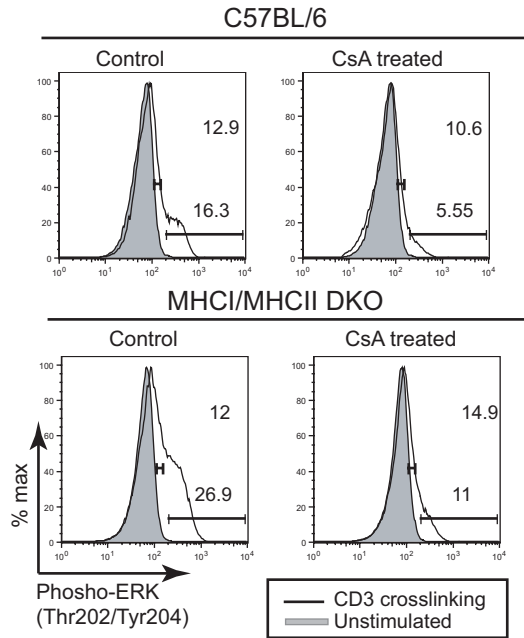

b Purity of thymocytes used for microarray analysis

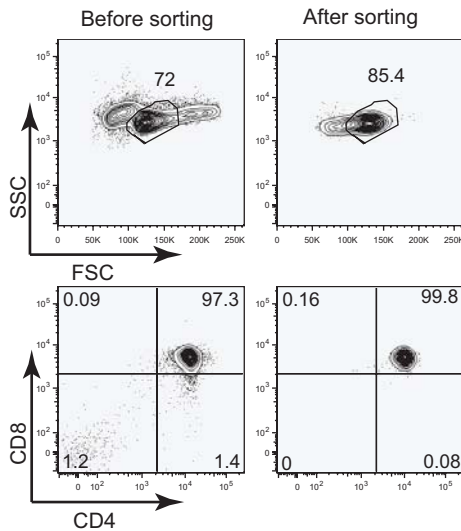

c Color-coded signal intensity of probe sets significantly changed in DP thymocytes sorted from MHCII/MHCI DKO mice treated or not with CsA; experiment clustering according to all probe sets also shown.

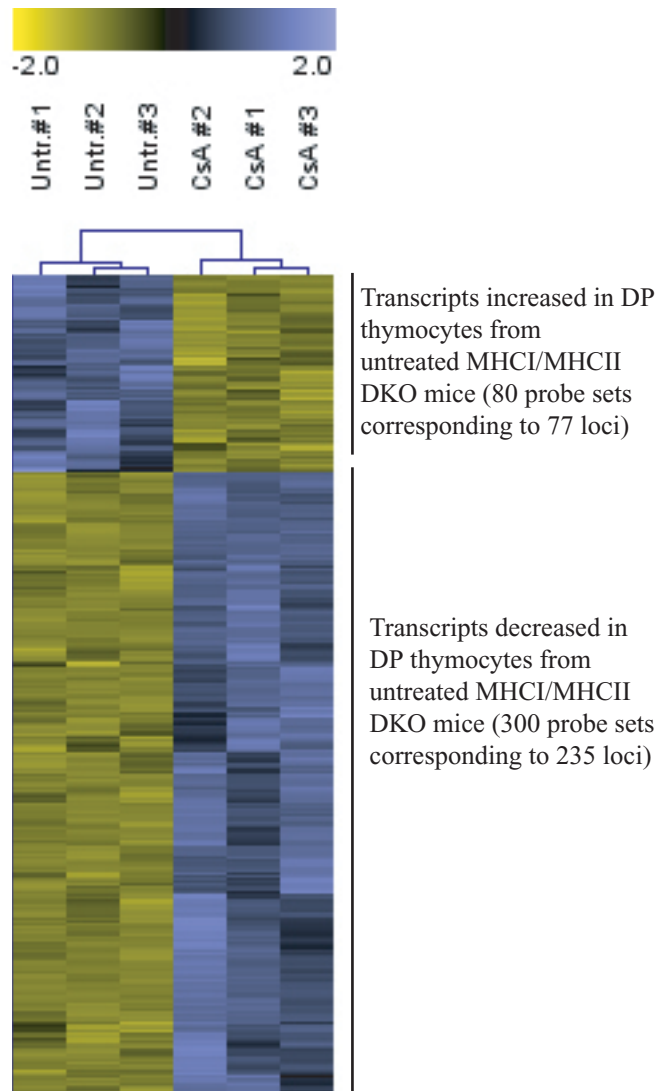

### Supplementary Figure 4

#### Canonical MHC-TCR interaction is not required for development of the “Erk high competence” population.

a) Comparison of phosho-Erk staining after CD3 $\epsilon$  cross-linking (2 min) in CD4<sup>+</sup>CD8<sup>+</sup> DP CD69<sup>-</sup> thymocytes from untreated and CsA-treated MHCII/MHCI double deficient mice (DKO) and age-matched C57BL/6 controls. Development of the “Erk high competence” population is observed even in the absence of canonical MHC-TCR interaction and it is inhibited by long term in vivo CsA treatment.

b) Analysis by flow cytometry of sorted DP thymocytes used for microarray analysis

c) Experiment clustering and color-coded signal intensity of probe sets whose expression is significantly changed in DP thymocytes sorted from CsA-treated and untreated MHCII/MHCI DKO mice. Probe sets were considered significantly changed if all these conditions were satisfied: 100% change call in all 9-pairwise comparisons in GCOS, absolute signal log ratio  $\geq 1$ , and significant call by one-way ANOVA with  $p \leq 0.01$ .

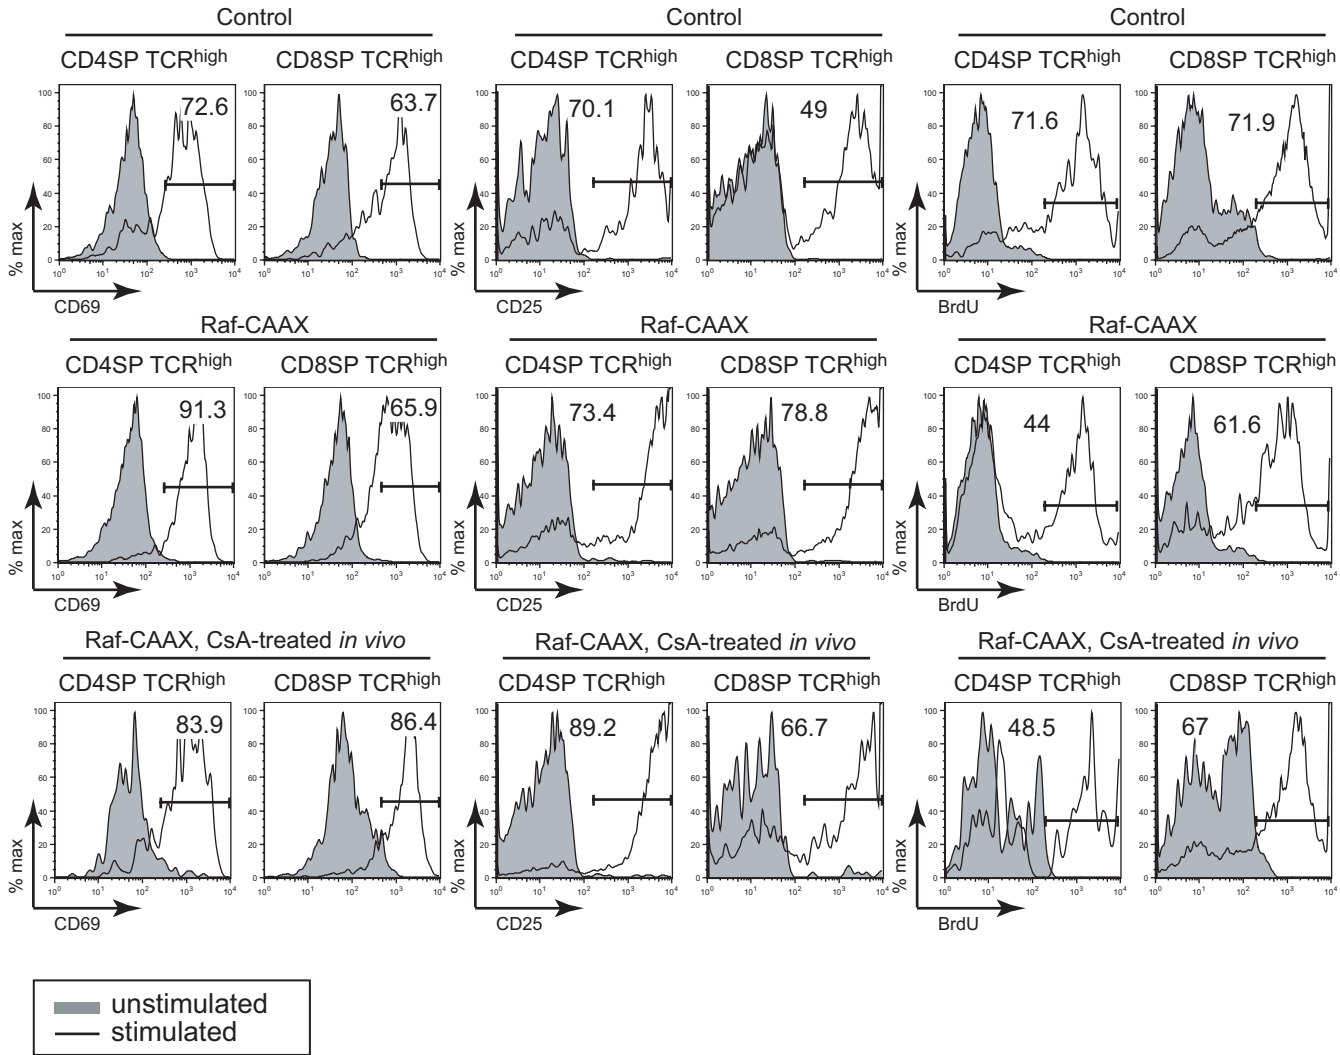

### Supplementary Figure 5

#### Single Positive thymocytes that develop in CsA-treated Raf-CAAX can functionally respond to TCR stimulation

Total thymocytes from mice of the indicated genotype were stimulated with anti-CD3 and anti-CD28 (note that the stimulation was performed in the absence of CsA for all samples). Thymocytes were analyzed by flow cytometry for upregulation of activation markers CD69 and CD25 (48 hours) and BrdU incorporation (68 hours). For BrdU staining cells were pulsed with BrdU (10mM) for the last 18 hours of stimulation. Because of the absence of CD4SP and CD8SP in wild type mice treated with CsA, these cells could not be analyzed.

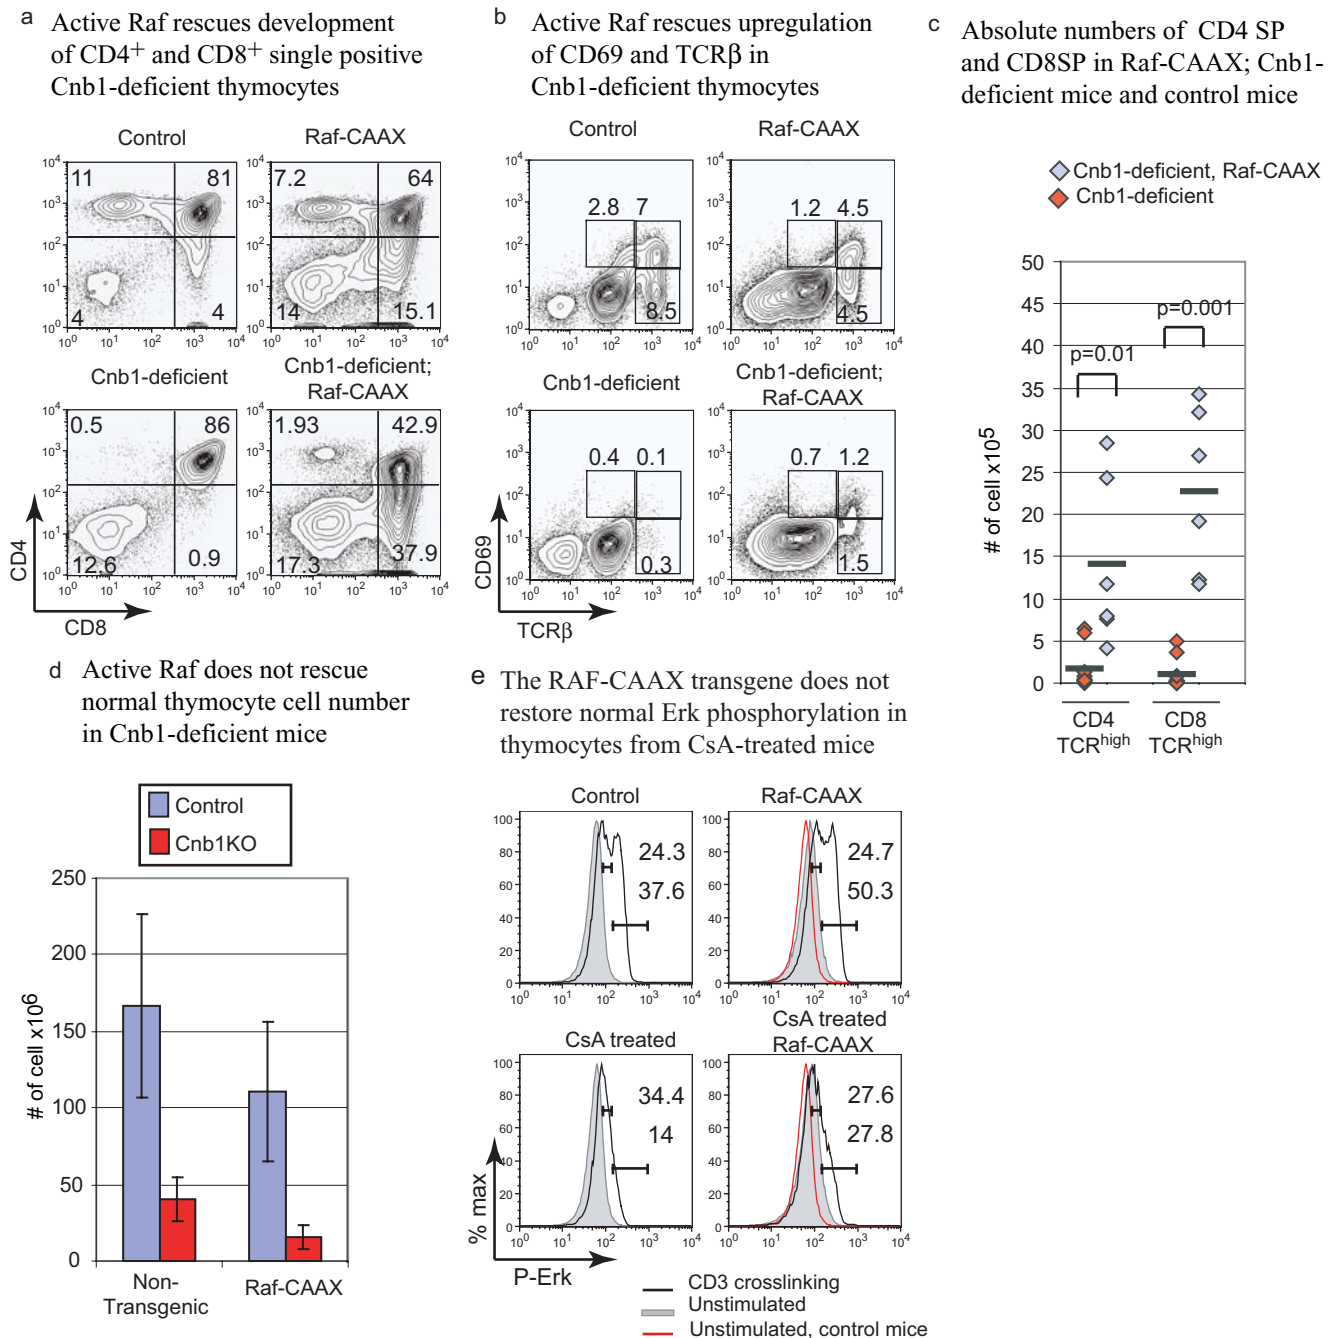

## Supplementary Figure 6

**The RAF-CAAX transgene partially rescues positive selection in Cnb1-deficient mice.** Cnb1-deficient thymocytes expressing the RAF-CAAX transgene and control mice were analyzed for CD4, CD8, TCR $\beta$  and CD69 expression a) The RAF-CAAX transgene partially rescues development of Cnb1-deficient CD4 and CD8 SP thymocytes. b) The RAF-CAAX transgene rescues upregulation of TCR $\beta$  and CD69 in Cnb1-deficient thymocytes. c) Absolute numbers of TCR<sup>high</sup> CD4 and TCR<sup>high</sup> CD8 SP thymocytes in mice of indicated genotype ( $n \geq 6$ , bar shows average). d) Absolute thymocyte numbers in mice of indicated genotype ( $n \geq 6$ , mean  $\pm$  s.d.). e) Phospho-Erk staining after CD3 $\epsilon$  crosslinking (2 min) in CD4<sup>+</sup>CD8<sup>+</sup> thymocytes from untreated and CsA-treated (30mg/Kg/day, 14 days) RAF-CAAX and control mice. Development of the “Erk high competency” population is not rescued by the RAF-CAAX transgene; basal levels of Erk phosphorylation appear increased.

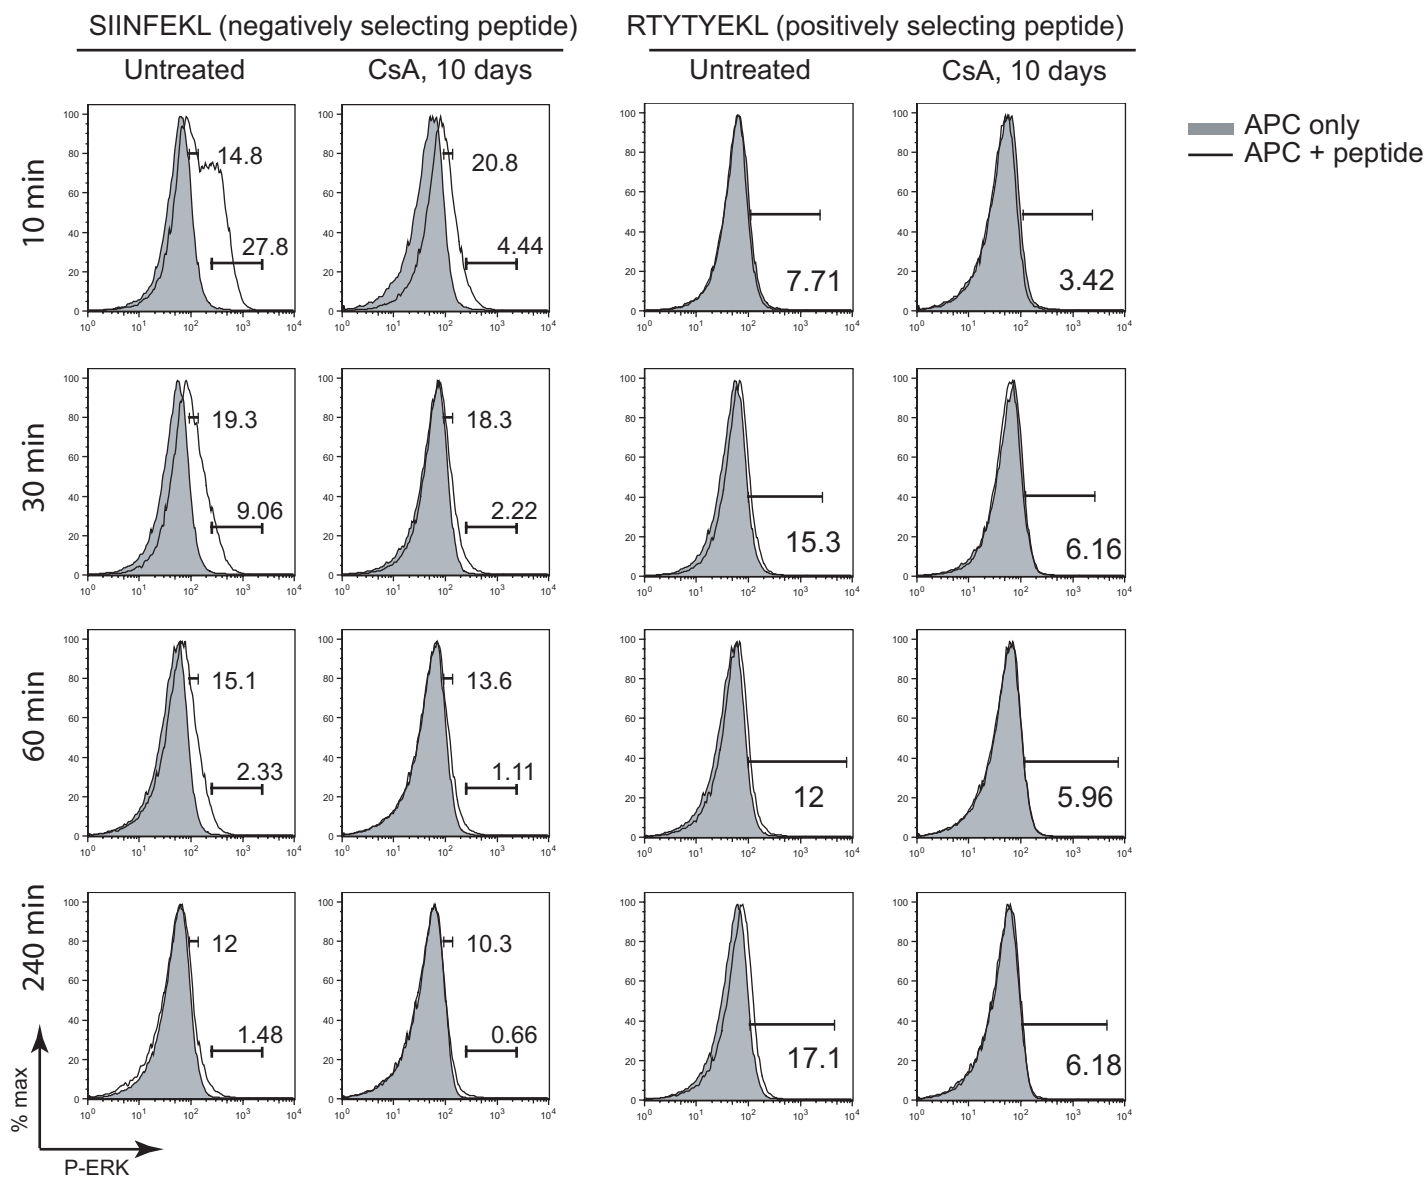

### Supplementary Figure 7

**Thymocytes that develop in CsA-treated OTI TAP<sup>0</sup> mice phosphorylate Erk in response to negative selecting but not positively selecting ligands.**

Thymocytes from CsA-treated OT-I TAP<sup>0</sup> mice and untreated controls were stimulated with T2-H-2K<sup>b</sup> antigen presenting cells (APC) pulsed with SIINFEKL or RYTYTYEKL. Erk phosphorylation was analyzed at the indicated time points by flow cytometry as described in experimental procedures.

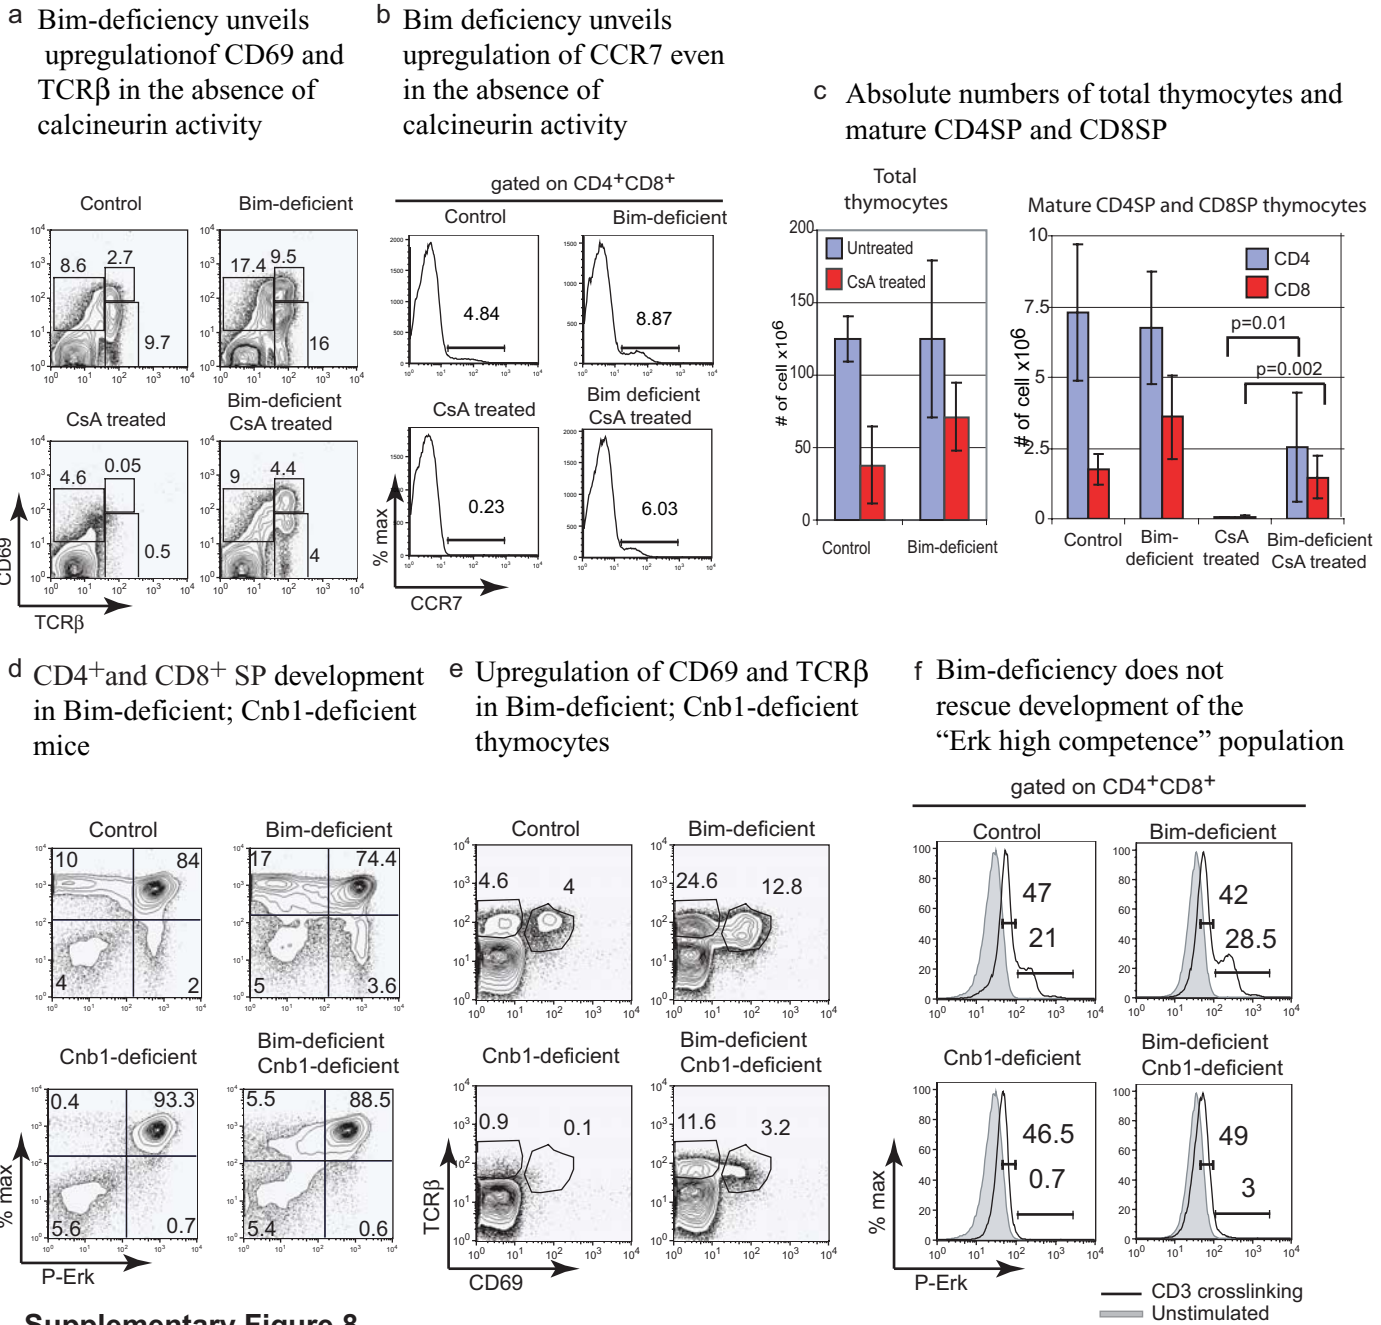

**Supplementary Figure 8**

**Bim-deficiency unveils positive selection in the absence of calcineurin activity and results in development of auto-reactive thymocytes.**

Control and Bim-deficient mice were treated with CsA (30mg/Kg/day, i.p.) for 14 days or left untreated.

a) Levels of CD69 and TCR $\beta$  on developing thymocytes as measured by flow cytometry. b) CCR7 expression on DP thymocytes as analyzed by flow cytometry. c) Absolute numbers of total thymocytes and CD4SP and CD8SP thymocytes in Bim-deficient mice, treated or not with CsA (n=5, mean  $\pm$  s.d.) d) Thymocytes from mice of the indicated genotype were analyzed for CD4 and CD8 expression. e) Thymocytes from mice of the indicated genotype were analyzed for CD69 and TCR $\beta$  expression. f) Comparison of phospho-Erk staining after CD3 $\epsilon$  cross-linking (2 min) in CD4<sup>+</sup>CD8<sup>+</sup> thymocytes from mice of the indicated genotype. Development of the Erk high competency is not rescued by Bim-deficiency.



a Inhibition of calcineurin activity by CsA inhibits positive selection in Bim-deficient female but not in Bim-deficient male mice.

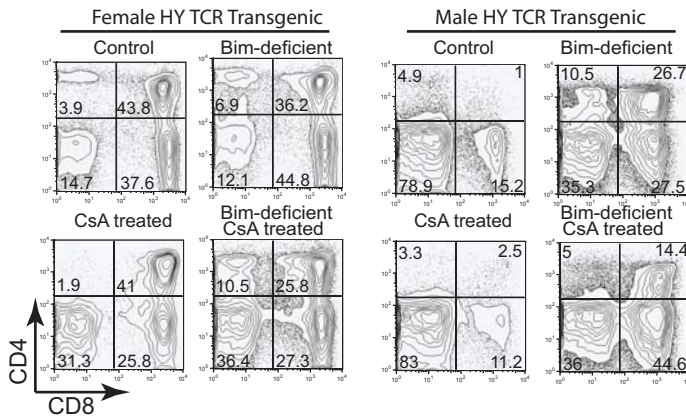

b Inhibition of calcineurin activity by CsA blocks CD69 upregulation in Bim-deficient HY transgenic female mice but not in Bim-deficient HY transgenic male mice

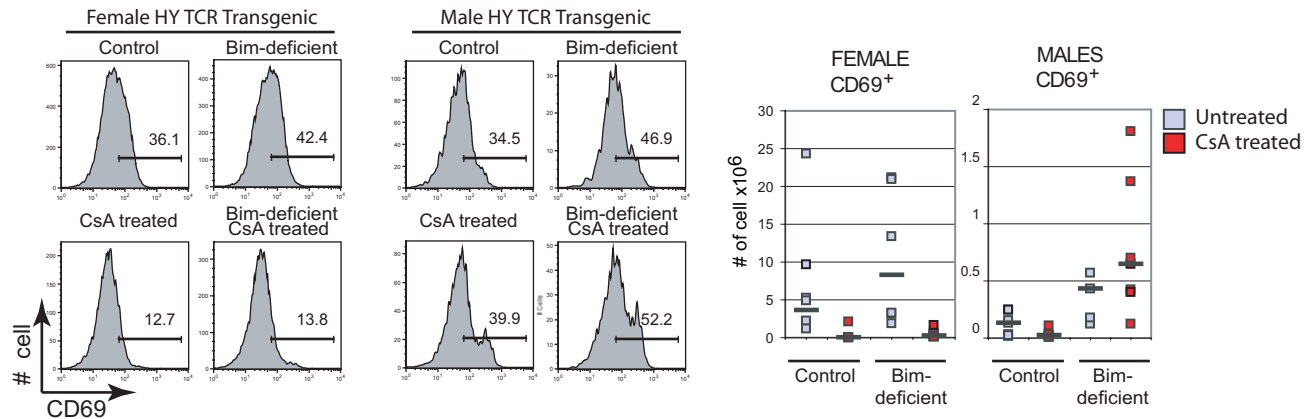

c Inhibition of calcineurin activity by CsA blocks Qa2 upregulation in Bim-deficient HY transgenic female mice but not in Bim-deficient HY transgenic male mice

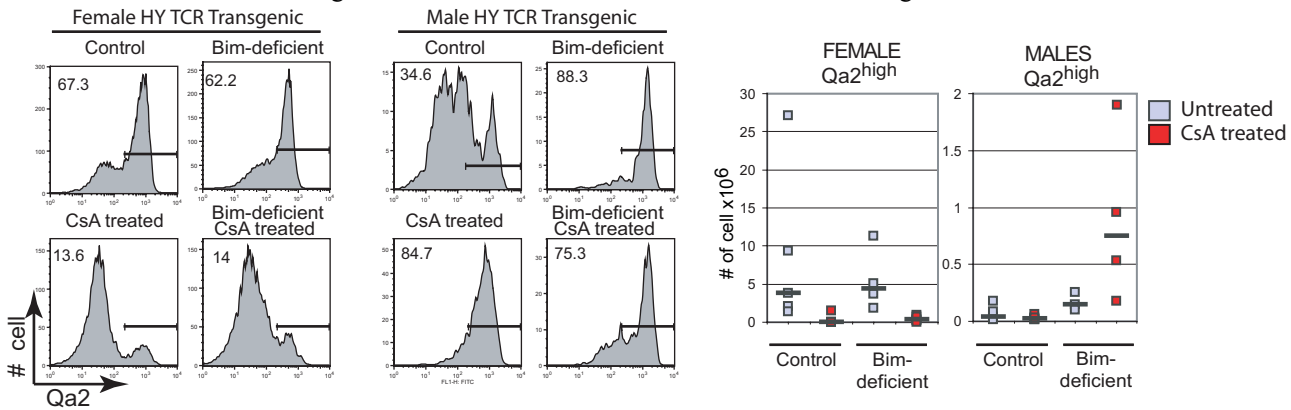

**Supplementary Figure 9**

**Bim-deficiency unveils “positive selection” by negative selecting ligands in the absence of calcineurin activity.** Control and Bim-deficient HY transgenic male and female mice were treated with CsA (30mg/Kg/day, i.p.) for 14 days or left untreated. a) Expression of CD4 and CD8 in mice of indicated genotype. CsA treatment results in accumulation of CD8ISP in HY mice. b) Levels of CD69 were measured by flow cytometry on HY<sup>+</sup> CD8<sup>+</sup> thymocytes. CsA blocks CD69 upregulation in Bim-deficient females but not in Bim-deficient males. n<sub>≥</sub>4, bar indicates median value b) Levels of Qa2 were measured by flow cytometry on HY<sup>+</sup> CD8<sup>SP</sup> thymocytes. CsA blocks Qa2 upregulation in Bim-deficient females but not in Bim-deficient males. n<sub>≥</sub>4, bar indicates median value.

Supplementary Table 1. Probe sets ID, gene name, Entrez Gene ID, signal, signal log ratio and change calls for probe sets differentially expressed in DP Thymocytes sorted from untreated and Csa-treated MHCII DKO mice

| Probe set ID | Gene Name     | Entrez Gene ID | Average log ratio | GO Biological Process                        | SIGNAL       |              |              |                | pValue | C1 vs C2       |                | C1 vs C3      |             | C1 vs C4  |             | C1 vs C5  |             | C1 vs C6  |             | C1 vs C7  |             | C1 vs C8  |             | C1 vs C9  |             | C1 vs C10 |             |           |
|--------------|---------------|----------------|-------------------|----------------------------------------------|--------------|--------------|--------------|----------------|--------|----------------|----------------|---------------|-------------|-----------|-------------|-----------|-------------|-----------|-------------|-----------|-------------|-----------|-------------|-----------|-------------|-----------|-------------|-----------|
|              |               |                |                   |                                              | Untreated #1 | Untreated #2 | Untreated #3 | Csa treated #1 |        | Csa treated #2 | Csa treated #3 | raw-way ANOVA | change call | log ratio |
| 144385       | Gabra2        | 14355          | 1.56              | ion transport                                | 1305.5       | 1403.1       | 1530.7       | 414.4          | 370.4  | 465.2          | 4.76E-04       | 1.25          | 1.68        | 1.55      | 1.14        | 1.18      | 1.75        | 1.8       | 1.34        | 1.2       | 1.76        | 1.1       | 1.76        | 1.1       | 1.76        | 1.1       | 1.76        |           |
| 144547       | Adams18       | 20939          | 1.63              | proliferation                                | 2916.2       | 2542.6       | 2945.5       | 1275.5         | 760.8  | 1280           | 0.0014046      | 1.54          | 1.23        | 1.47      | 1.33        | 1.83      | 1.31        | 1.28      | 1.67        | 1.23      | 1.1         | 1.23      | 1.1         | 1.23      | 1.1         | 1.23      |             |           |
| 145183_a_1   | H2-D1         | 14064          | 1.5               | antigen processing and presentation          | 329.7        | 388.3        | 406.1        | 139.8          | 136.4  | 208.4          | 0.0027415      | 1.34          | 1.85        | 1.37      | 1.51        | 1.2       | 1.06        | 1.75      | 1.77        | 1.1       | 1.20        | 1.1       | 1.20        | 1.1       | 1.20        | 1.1       | 1.20        |           |
| 145576       | Kcnk1         | 16485          | 1.47              | ion transport                                | 1283.6       | 1110         | 947.5        | 364.7          | 433.3  | 381.5          | 0.0019009      | 1.69          | 1.61        | 1.38      | 1.52        | 1.49      | 1.8         | 1.19      | 1.36        | 1.4       | 1.1         | 1.36      | 1.4         | 1.1       | 1.36        | 1.4       | 1.1         |           |
| 144434_c_1   |               |                | 1.4               |                                              | 3168.8       | 2479.7       | 3352.6       | 1241.6         | 899.7  | 1614.9         | 0.0053363      | 1.29          | 1.35        | 1.17      | 1.85        | 1.55      | 0.59        | 1.57      | 2.16        | 1.5       | 1.1         | 1.57      | 1.5         | 1.1       | 1.57        | 1.5       | 1.1         |           |
| 145567_c_1   |               |                | 1.39              |                                              | 1285.6       | 1421.6       | 1548.8       | 529.9          | 397.6  | 551.6          | 5.05E-04       | 1.28          | 1.76        | 1.29      | 1.02        | 1.59      | 1.28        | 1.1       | 1.71        | 1.5       | 1.1         | 1.71      | 1.5         | 1.1       | 1.71        | 1.5       | 1.1         |           |
| 144484       |               |                | 1.34              |                                              | 1498         | 1107.6       | 1353.3       | 529.5          | 610.8  | 542            | 0.002221       | 1.58          | 1.83        | 1.48      | 1.2         | 1.24      | 1.12        | 1.18      | 1.2         | 1.42      | 1.1         | 1.42      | 1.1         | 1.42      | 1.1         | 1.42      | 1.1         |           |
| 142781_c_1   | D18E0853a     | 52862          | 1.33              |                                              | 514.5        | 604.6        | 543.3        | 265.4          | 337.2  | 173.8          | 0.0055987      | 1.12          | 1.92        | 1.44      | 1.35        | 1.57      | 1.54        | 1.55      | 1.32        | 1.13      | 1.1         | 1.32      | 1.1         | 1.32      | 1.1         | 1.32      | 1.1         |           |
| 1442945_c_1  | C130029A03R0  | 20395          | 1.91              |                                              | 1695         | 1507.7       | 1343         | 659.6          | 475.7  | 513.4          | 0.0011403      | 1.22          | 1.61        | 1.13      | 1.12        | 1.72      | 1.2         | 1.11      | 1.71        | 0.98      | 1.1         | 1.71      | 0.98        | 1.1       | 1.71        | 0.98      | 1.1         |           |
| 1449158_c_1  | Kcnk2         | 16826          | 1.3               | ion transport                                | 1344.9       | 1960.4       | 1346.6       | 483.5          | 954.1  | 612.2          | 4.26E-04       | 1.46          | 1.07        | 0.83      | 1.6         | 1.42      | 1.27        | 1.58      | 1.38        | 1.1       | 1.38        | 1.1       | 1.38        | 1.1       | 1.38        | 1.1       | 1.38        |           |
| 1445837_c_1  |               |                | 1.29              |                                              | 7220.7       | 8056.8       | 7964.4       | 3540           | 2681   | 4405.9         | 0.0017228      | 1.16          | 1.52        | 1.09      | 1.32        | 1.59      | 1.08        | 1.17      | 1.65        | 1.11      | 1.1         | 1.65      | 1.11        | 1.1       | 1.65        | 1.11      | 1.1         |           |
| 1446943_c_1  | S330490N76a   | 319786         | 1.27              |                                              | 4440.2       | 4395.7       | 4006.8       | 2093.9         | 1502.8 | 1801.5         | 3.47E-04       | 1.2           | 1.78        | 1.28      | 1.16        | 1.73      | 1.18        | 0.85      | 1.42        | 0.91      | 1.1         | 1.42      | 0.91        | 1.1       | 1.42        | 0.91      | 1.1         |           |
| 1435145_c_1  | Cadn1         | 23887          | 1.26              | cell-cell adhesion                           | 654.9        | 801.1        | 841.5        | 309.9          | 307.6  | 114.3          | 0.0043881      | 0.78          | 0.58        | 1.17      | 0.97        | 1.04      | 2.05        | 1         | 1.01        | 2.17      | 1.1         | 2.17      | 1.1         | 2.17      | 1.1         | 2.17      | 1.1         |           |
| 1446537_c_1  |               |                | 1.24              |                                              | 2847.7       | 3296.4       | 3978.8       | 1531.5         | 1275   | 1279.8         | 0.0040638      | 0.9           | 0.97        | 1.09      | 1.12        | 1.20      | 1.45        | 1.3       | 1.48        | 1.56      | 1.1         | 1.56      | 1.1         | 1.56      | 1.1         | 1.56      | 1.1         |           |
| 1422834_c_1  | Kcnk2         | 16808          | 1.24              | ion transport                                | 311.1        | 3169.6       | 2617.3       | 1179.9         | 1118.4 | 1123.5         | 4.91E-04       | 1.21          | 1.14        | 1.41      | 1.29        | 1.1       | 1.38        | 1.17      | 1.13        | 1.2       | 1.1         | 1.13      | 1.2         | 1.1       | 1.13        | 1.2       | 1.1         |           |
| 1423233_c_1  | Gata2         | 14812          | 1.24              | hematopoiesis                                | 1827.6       | 1899.3       | 1688         | 1033.6         | 648.8  | 1065.2         | 0.0038199      | 1.28          | 1.83        | 1.25      | 1.19        | 1.6       | 1.1         | 0.9       | 1.25        | 1         | 1.1         | 1.25      | 1           | 1.1       | 1.25        | 1         | 1.1         |           |
| 1460214_c_1  | Pip4          | 18846          | 1.23              |                                              | 9103.8       | 7006.3       | 7948         | 3741.9         | 4016.2 | 3998.6         | 0.0029705      | 1.67          | 1.39        | 1.16      | 1.14        | 0.93      | 0.8         | 1.81      | 1.31        | 1.06      | 1.1         | 1.06      | 1.1         | 1.06      | 1.1         | 1.06      | 1.1         |           |
| 1458187_c_1  |               |                | 1.23              |                                              | 2467.8       | 2897.1       | 2769.2       | 1654           | 680.9  | 1396.8         | 0.009891       | 0.59          | 1.7         | 0.59      | 1.02        | 1.89      | 0.87        | 1.07      | 2.16        | 1.21      | 1.1         | 2.16      | 1.21        | 1.1       | 2.16        | 1.21      | 1.1         |           |
| 1438462_c_1  | Nef1          | 74103          | 1.23              | transport                                    | 1420.3       | 1273.6       | 1026.3       | 598.8          | 465.3  | 470.1          | 0.0040212      | 1.12          | 1.37        | 1.61      | 1.01        | 1.25      | 1.48        | 0.9       | 1.04        | 1.29      | 1.1         | 1.29      | 1.1         | 1.29      | 1.1         | 1.29      | 1.1         |           |
| 1421892_c_1  | ion transport |                | 1.23              |                                              | 1147.1       | 1552.5       | 1167.3       | 665.8          | 519.7  | 670.5          | 0.0089194      | 1.14          | 1.52        | 1         | 1.34        | 1.4       | 1.26        | 1.08      | 1.45        | 0.92      | 1.1         | 0.92      | 1.1         | 0.92      | 1.1         | 0.92      | 1.1         |           |
| 1457898_c_1  |               |                | 1.2               |                                              | 3332.4       | 3058.3       | 3991.8       | 1502.2         | 1290.2 | 1819.3         | 0.0037174      | 1.26          | 1.33        | 0.91      | 1.15        | 1.28      | 0.81        | 1.35      | 1.6         | 1.13      | 1.1         | 1.6       | 1.13        | 1.1       | 1.6         | 1.13      | 1.1         |           |
| 1425382_c_1  | Aqp4          | 11829          | 1.2               | water transport                              | 2634.9       | 2318.3       | 2096.1       | 1211.2         | 812.9  | 955.4          | 0.0022465      | 0.97          | 1.7         | 1.37      | 0.87        | 1.49      | 1.27        | 0.79      | 1.27        | 1.07      | 1.07        | 1.07      | 1.07        | 1.07      | 1.07        | 1.07      | 1.07        | 1.07      |
| 1456119_c_1  | Dmd5          | 106071         | 1.19              | G-protein coupled receptor activity          | 1154         | 1325.6       | 1273.8       | 768.2          | 537.1  | 386.1          | 0.0039005      | 0.94          | 1.05        | 1.27      | 1.04        | 1.1       | 1.39        | 1.13      | 1.13        | 1.27      | 1.44        | 1.1       | 1.27        | 1.44      | 1.1         | 1.27      | 1.44        | 1.1       |
| 1451280_c_1  | Aqp21         | 74100          | 1.19              |                                              | 2633.3       | 2426.6       | 2554.4       | 1075.9         | 1001   | 1254.4         | 1.21E-04       | 1.27          | 1.34        | 1.24      | 1.1         | 1.17      | 1.16        | 1.06      | 1.41        | 1         | 1           | 1.41      | 1           | 1         | 1.41        | 1         | 1           |           |
| 1446212_c_1  |               |                | 1.19              |                                              | 1968.6       | 2081.5       | 2552.4       | 1230.9         | 990.3  | 873.7          | 0.0048537      | 0.71          | 1.12        | 1.11      | 0.96        | 1.19      | 1.27        | 1.23      | 1.53        | 1.62      | 1.1         | 1.62      | 1.1         | 1.62      | 1.1         | 1.62      | 1.1         |           |
| 1443127_c_1  | HE30021D09R0  | 319298         | 1.19              |                                              | 2588.5       | 3402.3       | 2845.5       | 1640.4         | 1093.7 | 1495           | 0.0072722      | 0.65          | 1.44        | 0.83      | 0.99        | 1.75      | 1.08        | 0.91      | 1.88        | 1.24      | 1.1         | 1.88      | 1.24        | 1.1       | 1.88        | 1.24      | 1.1         |           |
| 1421941_c_1  | Cank4         | 12206          | 1.19              | protein amino acid phosphorylation           | 2915.4       | 2657         | 2593.3       | 1403.5         | 1213.9 | 933.7          | 5.79E-04       | 1.14          | 1.36        | 1.8       | 0.96        | 1.4       | 1.44        | 0.76      | 1.04        | 1.1       | 1.1         | 1.04      | 1.1         | 1.04      | 1.1         | 1.04      | 1.1         | 1.04      |
| 1458123_c_1  | HE30002A11R0  | 319888         | 1.18              |                                              | 1963.2       | 2343.9       | 2218.5       | 1002.5         | 829.4  | 1489.7         | 0.0010724      | 1.3           | 1.42        | 0.82      | 1.09        | 1.67      | 0.88        | 1.11      | 1.39        | 0.92      | 1.1         | 0.92      | 1.1         | 0.92      | 1.1         | 0.92      | 1.1         |           |
| 1448634_a_1  | Akw10         | 544718         | 1.18              |                                              | 1581.5       | 4685.2       | 4468.8       | 1908.4         | 2042.7 | 1949.4         | 0.0014004      | 1.38          | 1.41        | 1.24      | 1.07        | 1.14      | 1.21        | 1.02      | 1.03        | 1.11      | 1.1         | 1.03      | 1.11        | 1.1       | 1.03        | 1.11      | 1.1         |           |
| 1443101_c_1  | Dmd2          | 14084          | 1.18              | ion transport                                | 506.7        | 595.6        | 464.7        | 388.9          | 136.7  | 201.8          | 0.0059005      | 0.74          | 1.12        | 1.38      | 1.33        | 1.49      | 1.46        | 0.56      | 1.4         | 1.15      | 1.1         | 1.15      | 1.1         | 1.15      | 1.1         | 1.15      | 1.1         |           |
| 1427580_a_1  | Rian          | 75745          | 1.18              |                                              | 1882.2       | 1880.6       | 1751.8       | 1030.8         | 809.4  | 772.3          | 7.53E-04       | 1.09          | 1.07        | 0.97      | 1.16        | 1.24      | 1.13        | 1.21      | 1.3         | 1.24      | 1.1         | 1.3       | 1.24        | 1.1       | 1.3         | 1.24      | 1.1         |           |
| 1433788_c_1  | Nax3          | 18191          | 1.17              | synaptogenesis                               | 2241.7       | 2748.3       | 3180         | 1275.1         | 1422.4 | 967.7          | 0.0078762      | 0.66          | 0.95        | 1.41      | 1.02        | 0.97      | 1.43        | 1.2       | 1.12        | 1.51      | 1.1         | 1.51      | 1.1         | 1.51      | 1.1         | 1.51      | 1.1         |           |
| 1424400_a_1  | A8B111        | 107747         | 1.17              | hematopoiesis                                | 1750.7       | 1394.1       | 1570.3       | 784.5          | 682.2  | 728.7          | 0.0031166      | 1.38          | 1.42        | 1.46      | 0.92        | 1.01      | 0.98        | 1.08      | 1.09        | 1.24      | 1.1         | 1.24      | 1.1         | 1.24      | 1.1         | 1.24      | 1.1         |           |
| 1458830_c_1  | Fgfr4         | 14169          | 1.16              |                                              | 1774.2       | 2257.5       | 2665.4       | 973.3          | 933    | 993.9          | 0.0074234      | 0.75          | 0.89        | 0.87      | 1.22        | 0.97      | 1.25        | 1.35      | 1.34        | 1.38      | 1.1         | 1.38      | 1.1         | 1.38      | 1.1         | 1.38      | 1.1         |           |
| 1441785_c_1  | Mafk          | 17762          | 1.16              | mitochondrial cytochrome c expression        | 2401.3       | 2246.8       | 2004.4       | 1160.7         | 997.2  | 1313.5         | 0.0050989      | 0.77          | 1.52        | 0.93      | 0.82        | 1.59      | 1.05        | 1.07      | 1.69        | 1         | 1           | 1.69      | 1           | 1         | 1.69        | 1         | 1           |           |
| 1455438_c_1  | Dnae2         | 68203          | 1.15              | small GTPase mediated signaling              | 7291.6       | 7170.7       | 6400         | 2996           | 3303.2 | 3204.4         | 7.94E-04       | 1.28          | 1.18        | 1.27      | 1.28        | 1.17      | 1.12        | 1.09      | 1.04        | 0.94      | 1.1         | 0.94      | 1.1         | 0.94      | 1.1         | 0.94      | 1.1         |           |
| 1450488_c_1  | Qpvt1         | 18389          | 1.13              | G-protein coupled receptor protein signaling | 1414.1       | 1319.6       | 1649         | 588.5          | 617.8  | 524.1          | 8.53E-05       | 1.16          | 1.17        | 1.38      | 0.95        | 0.97      | 1.24        | 1.08      | 1.04        | 1.2       | 1.1         | 1.2       | 1.1         | 1.2       | 1.1         | 1.2       | 1.1         |           |
| 1440112_c_1  | Lrrn3         | 210028         | 1.13              |                                              | 3196.7       | 3229.1       | 3704.4       | 1505.9         | 1488.9 | 1720.9         | 4.08E-04       | 1.24          | 1.21        | 0.89      | 1.07        | 1.31      | 0.85        | 1.25      | 1.37        | 0.94      | 1.1         | 0.94      | 1.1         | 0.94      | 1.1         | 0.94      | 1.1         |           |
| 1421225_a_1  | Slc64a        | 54033          | 1.13              | ion transport                                | 1700.6       | 1944.8       | 1814         | 908            | 1157.3 | 684.2          | 0.0041956      | 1.22          | 0.87        | 1.56      | 1.11        | 0.87      | 0.97        | 1.37      | 1.07        | 0.89      | 1.38        | 1.1       | 0.89        | 1.38      | 1.1         | 0.89      | 1.38        | 1.1       |
| 1445488_c_1  |               |                | 1.12              |                                              | 2351.1       | 2167.9       | 2430.1       | 1329.5         | 1212.4 | 762.5          | 0.0030395      | 0.95          | 0.97        | 1.45      | 0.87        | 1.03      | 1.07        | 0.8       | 0.95        | 1.49      | 1.1         | 0.95      |             |           |             |           |             |           |

| Probe set ID | Gene Name | Enzr Gene ID | Average log <sub>2</sub> ratio | GO Biological Process                        | SIGNAL      |             |             | SIGNAL         |                |                | pValue    | U1 vs. C1     |                        | U1 vs. C2   |                        | U2 vs. C1   |                        | U2 vs. C2   |                        | U3 vs. C1   |                        | U3 vs. C2   |                        |             |                        |             |   |       |   |
|--------------|-----------|--------------|--------------------------------|----------------------------------------------|-------------|-------------|-------------|----------------|----------------|----------------|-----------|---------------|------------------------|-------------|------------------------|-------------|------------------------|-------------|------------------------|-------------|------------------------|-------------|------------------------|-------------|------------------------|-------------|---|-------|---|
|              |           |              |                                |                                              | Unstratd #1 | Unstratd #2 | Unstratd #3 | CNA treated #1 | CNA treated #2 | CNA treated #3 |           | one-way ANOVA | log <sub>2</sub> ratio | change call |   |       |   |
| 1415810_t1   | Gli3      | 18140        | -4.4                           | DNA repair                                   | 305.3       | 149.6       | 159.8       | 4073.8         | 6187.6         | 3228.3         | 0.002272  | -3.87         | D                      | -4.51       | D                      | -3.88       | D                      | -4.46       | D                      | -4.88       | D                      | -4.2        | D                      | -4.67       | D                      | -4.27       | D |       |   |
| 1424046_t1   | Bub1      | 12235        | -5.8                           | protein amino acid phosphorylation           | 16.7        | 20          | 2.3         | 521.8          | 768.1          | 788.5          | 0.002195  | -4.71         | D                      | -5.42       | D                      | -4.79       | D                      | -4.69       | D                      | -5.34       | D                      | -4.09       | D                      | -7.91       | D                      | -8.05       | D | -7.16 | D |
| 1430811_t1   | Nu2       | 68077        | -5.17                          | cell cycle                                   | 17.6        | 23.7        | 20.4        | 855.3          | 1228           | 789.9          | 0.002001  | -5.06         | D                      | -5.45       | D                      | -5.14       | D                      | -5.12       | D                      | -5.33       | D                      | -4.95       | D                      | -4.8        | D                      | -6.21       | D | -6.11 | D |
| 1416120_t1   | Rim2      | 20135        | -5.01                          | DNA replication                              | 39.6        | 299.7       | 60.7        | 2636.5         | 2318.6         | 1504.3         | 8.26E-04  | -6.65         | D                      | -6.82       | D                      | -6.82       | D                      | -3.16       | D                      | -2.71       | D                      | -3.14       | D                      | -5.44       | D                      | -5.46       | D | -5.33 | D |
| 1419513_t1   | Ect2      | 13005        | -4.94                          | regulation of progression through cell cycle | 2.9         | 52.2        | 19.8        | 1024.9         | 1200           | 797.8          | 0.002283  | -7.27         | D                      | -7.99       | D                      | -6.14       | D                      | -3.36       | D                      | -4.05       | D                      | -2.31       | D                      | -4.75       | D                      | -4.82       | D | -3.78 | D |
| 1435306_t1   | KIF11     | 16551        | -4.93                          | microtubule-based process                    | 196.4       | 231         | 101.8       | 4471.7         | 6511.2         | 5780.8         | 8.25E-04  | -4.42         | D                      | -5.05       | D                      | -4.84       | D                      | -4.30       | D                      | -4.86       | D                      | -4.65       | D                      | -5.06       | D                      | -5.73       | D | -5.45 | D |
| 1452314_t1   | KIF11     | 16551        | -4.7                           | microtubule-based process                    | 107.7       | 107.1       | 9.6         | 2019.5         | 2048.8         | 1481.4         | 7.71E-04  | -3.94         | D                      | -4.01       | D                      | -3.55       | D                      | -4.09       | D                      | -4.29       | D                      | -3.73       | D                      | -6.36       | D                      | -6.66       | D | -5.63 | D |
| 1416251_t1   | Mom1      | 17219        | -4.69                          | DNA replication                              | 23.5        | 102.8       | 19          | 2025.1         | 1626.7         | 1422.5         | 0.001016  | -6.74         | D                      | -6.87       | D                      | -5.54       | D                      | -3.02       | D                      | -2.57       | D                      | -2.41       | D                      | -6.07       | D                      | -5.79       | D | -5.30 | D |
| 1447363_t1   | Bub1b     | 12236        | -4.64                          | protein amino acid phosphorylation           | 32.2        | 10.6        | 14          | 440.4          | 537.1          | 463            | 1.24E-04  | -4.31         | D                      | -4.13       | D                      | -3.78       | D                      | -5.22       | D                      | -6          | D                      | -4.88       | D                      | -4.19       | D                      | -4.89       | D | -4.45 | D |
| 1455990_t1   | KIF23     | 71819        | -4.63                          | microtubule-based movement                   | 32.6        | 102.3       | 68.1        | 1392.6         | 1194.9         | 1236.4         | 2.03E-05  | -5.34         | D                      | -5.3        | D                      | -5.2        | D                      | -3.91       | D                      | -3.64       | D                      | -3.72       | D                      | -4.72       | D                      | -4.94       | D | -4.89 | D |
| 1416076_t1   | Ccnb1     | 12429        | -4.55                          | regulation of progression through cell cycle | 70          | 15.3        | 104.3       | 1558.5         | 1077.5         | 1226.3         | 0.001044  | -4.04         | D                      | -4.29       | D                      | -3.82       | D                      | -5.98       | D                      | -6.05       | D                      | -5.72       | D                      | -3.85       | D                      | -3.9        | D | -3.42 | D |
| 1433893_t1   | Spag5     | 54141        | -4.51                          | proteinase                                   | 23.9        | 16.6        | 17.7        | 505.4          | 456            | 560.2          | 8.97E-05  | -4.09         | D                      | -4.36       | D                      | -4.76       | D                      | -4.41       | D                      | -4.92       | D                      | -5.11       | D                      | -4.01       | D                      | -4.29       | D | -4.64 | D |
| 1415811_t1   | Ubr1      | 18140        | -4.49                          | DNA repair                                   | 39.7        | 111.7       | 43.8        | 1145.6         | 1309.7         | 1204           | 2.71E-05  | -4.87         | D                      | -5.51       | D                      | -4.78       | D                      | -3.74       | D                      | -3.78       | D                      | -3.65       | D                      | -4.64       | D                      | -4.77       | D | -4.67 | D |
| 1436847_t1   | Cdk6      | 52276        | -4.44                          | cell cycle                                   | 103.3       | 110.9       | 52.2        | 1998.7         | 1910.8         | 1830.2         | 3.95E-06  | -4.17         | D                      | -4.06       | D                      | -3.86       | D                      | -4.02       | D                      | -3.83       | D                      | -4.03       | D                      | -5.79       | D                      | -5.08       | D | -5.11 | D |
| 1428953_t1   | Mom3      | 17215        | -4.34                          | DNA replication                              | 131.6       | 30.8        | 14.9        | 1322.1         | 1381.6         | 1673.9         | 2.04E-04  | -5.5          | D                      | -3.41       | D                      | -3.88       | D                      | -4.46       | D                      | -4.78       | D                      | -5.09       | D                      | -4.29       | D                      | -4.59       | D | -5.3  | D |
| 1437370_t1   | Spz2      | 68549        | -4.3                           | cell cycle                                   | 19.2        | 24.8        | 80.4        | 724.3          | 874.5          | 692.5          | 2.83E-04  | -4.72         | D                      | -4.72       | D                      | -4.79       | D                      | -5.04       | D                      | -5.03       | D                      | -5          | D                      | -3.3        | D                      | -3.12       | D | -2.98 | D |
| 1448226_t1   | Rim2      | 20135        | -4.28                          | DNA replication                              | 33.8        | 129.2       | 136.3       | 1953.6         | 2013.1         | 1199.3         | 0.002517  | -6.65         | D                      | -6.73       | D                      | -4.78       | D                      | -3.84       | D                      | -4.02       | D                      | -2.91       | D                      | -3.79       | D                      | -4.07       | D | -3.73 | D |
| 1452315_t1   | KIF11     | 16551        | -4.28                          | microtubule-based process                    | 6.7         | 156.7       | 151.8       | 2041.1         | 1766           | 1306.2         | 0.0018972 | -6.67         | D                      | -6.66       | D                      | -5.38       | D                      | -3.54       | D                      | -3.27       | D                      | -2.78       | D                      | -3.94       | D                      | -3.43       | D | -2.84 | D |
| 1429172_t1   | Nkap      | 54392        | -4.25                          |                                              | 121.8       | 23.1        | 114.2       | 1689.1         | 1681.4         | 1423.5         | 8.33E-05  | -6.81         | D                      | -3.75       | D                      | -3.46       | D                      | -5.64       | D                      | -5.53       | D                      | -5.2        | D                      | -3.78       | D                      | -3.92       | D | -3.14 | D |
| 1427707_t1   | Nkap      | 54392        | -4.22                          |                                              | 42.5        | 161.8       | 120.8       | 1752.2         | 2061.5         | 2143.4         | 1.12E-04  | -5.14         | D                      | -5.34       | D                      | -5.16       | D                      | -3.28       | D                      | -3.48       | D                      | -3.51       | D                      | -3.9        | D                      | -4.15       | D | -3.99 | D |
| 1434789_t1   | Dap3b1b   | 21681        | -4.2                           | signal transduction                          | 34.3        | 112.3       | 80.8        | 1422           | 1641.6         | 1597.8         | 1.81E-04  | -5.88         | D                      | -5.85       | D                      | -5.37       | D                      | -2.93       | D                      | -3.14       | D                      | -3.27       | D                      | -3.7        | D                      | -3.93       | D | -3.75 | D |
| 1441520_t1   | Aspm      | 12316        | -4.13                          | cell cycle                                   | 99.1        | 10.9        | 144.9       | 1256.4         | 1063.6         | 926.7          | 5.85E-04  | -3.54         | D                      | -3.25       | D                      | -3.15       | D                      | -4.73       | D                      | -4.56       | D                      | -6.12       | D                      | -2.76       | D                      | -2.53       | D | -2.51 | D |
| 1448777_t1   | Mom2      | 17216        | -4.12                          | DNA replication                              | 48          | 34.9        | 104.3       | 965.5          | 1055           | 977.8          | 1.62E-05  | -3.91         | D                      | -4.04       | D                      | -4.27       | D                      | -4.92       | D                      | -4.96       | D                      | -4.56       | D                      | -3.55       | D                      | -3.88       | D | -2.86 | D |
| 1424105_t1   | Pip1      | 30039        | -4.08                          | DNA metabolic process                        | 80.2        | 29.5        | 9.7         | 1734.4         | 1178.1         | 1662.9         | 0.001623  | -3.93         | D                      | -3.84       | D                      | -3.87       | D                      | -5.47       | D                      | -4.69       | D                      | -4.12       | D                      | -3.77       | D                      | -3.06       | D | -3.41 | D |
| 1455990_t1   | Cdc20     | 23426        | -4.06                          | cell cycle arrest                            | 160.8       | 11.9        | 10.9        | 757.8          | 542.3          | 795.8          | 0.0020911 | -1.79         | D                      | -1.86       | D                      | -1.98       | D                      | -5.36       | D                      | -4.77       | D                      | -6.15       | D                      | -5.61       | D                      | -5.09       | D | -5.24 | D |
| 1437251_t1   | Cdk6      | 108912       | -4.03                          | cell cycle                                   | 56.8        | 137         | 133.1       | 2546.7         | 1725           | 2046.0         | 0.001873  | -5.41         | D                      | -4.03       | D                      | -5.49       | D                      | -3.66       | D                      | -3.35       | D                      | -3.45       | D                      | -3.55       | D                      | -3.29       | D | -4.07 | D |
| 1418207_t1   | Exo1      | 28609        | -4.02                          | DNA repair                                   | 14.5        | 36          | 157.3       | 892.4          | 756.8          | 869.9          | 2.22E-04  | -3.77         | D                      | -5.47       | D                      | -5.38       | D                      | -4.42       | D                      | -4.25       | D                      | -4.37       | D                      | -2.07       | D                      | -2.54       | D | -1.92 | D |
| 1434817_t1   | Rim2      | 20135        | -4.01                          | DNA replication                              | 162.3       | 154.6       | 98.9        | 2203           | 2642.7         | 1913.3         | 3.75E-04  | -6.83         | D                      | -4.12       | D                      | -3.83       | D                      | -3.52       | D                      | -3.91       | D                      | -3.51       | D                      | -4.45       | D                      | -4.48       | D | -4.22 | D |
| 1435025_t1   | Cenpe     | 22941        | -4                             | microtubule-based movement                   | 19.1        | 16.1        | 7.5         | 489.8          | 497.2          | 374.3          | 3.46E-04  | -3.64         | D                      | -3.97       | D                      | -4.07       | D                      | -3.54       | D                      | -4.3        | D                      | -4.24       | D                      | -3.39       | D                      | -4.42       | D | -4.43 | D |
| 1420028_t1   | LOC871904 | 17215        | -3.98                          | DNA replication                              | 188.6       | 84.6        | 21.4        | 797.1          | 756.6          | 999.4          | 7.78E-04  | -4.17         | D                      | -1.94       | D                      | -2.13       | D                      | -3.76       | D                      | -3.58       | D                      | -3.86       | D                      | -6.51       | D                      | -5.25       | D | -6.64 | D |
| 1440924_t1   | Kif6      | 226922       | -3.98                          | microtubule-based movement                   | 27.4        | 81.8        | 10.3        | 721.6          | 716.9          | 302.9          | 0.003778  | -2.59         | D                      | -4.01       | D                      | -3.18       | D                      | -3.23       | D                      | -3.96       | D                      | -2.03       | D                      | -5.93       | D                      | -5.06       | D | -4.71 | D |
| 1421546_t1   | Racgap1   | 26334        | -3.97                          | cytokinesis                                  | 122.9       | 189.8       | 16.6        | 1102.3         | 875.6          | 1382.4         | 0.0013971 | -3.4          | D                      | -3.17       | D                      | -3.2        | D                      | -2.7        | D                      | -2.6        | D                      | -2.38       | D                      | -6.83       | D                      | -5.96       | D | -5.71 | D |
| 1436808_t1   | Mom1      | 17216        | -3.97                          | DNA replication                              | 84.6        | 104.8       | 67.8        | 1624.3         | 1614.4         | 1680.5         | 2.97E-07  | -3.69         | D                      | -3.6        | D                      | -3.63       | D                      | -4.22       | D                      | -4.19       | D                      | -3.59       | D                      | -4.23       | D                      | -4.18       | D | -4.2  | D |
| 1452459_t1   | Aspm      | 12316        | -3.96                          | cell cycle                                   | 23          | 101.6       | 194.7       | 1423.9         | 1605.4         | 1346.9         | 3.27E-04  | -3.5          | D                      | -5.5        | D                      | -5.07       | D                      | -3.53       | D                      | -3.78       | D                      | -3.29       | D                      | -2.98       | D                      | -3.2        | D | -2.83 | D |
| 1419043_t1   | Ccnb1     | 268697       | -3.95                          | regulation of progression through cell cycle | 18.4        | 30.8        | 133.1       | 798.6          | 782.1          | 706            | 1.10E-04  | -4.92         | D                      | -5.15       | D                      | -4.33       | D                      | -4.27       | D                      | -5.58       | D                      | -3.73       | D                      | -2.84       | D                      | -2.85       | D | -2.07 | D |
| 1430193_t1   | Cdc5      | 677208       | -3.91                          |                                              | 238.6       | 143.2       | 116.5       | 1954.4         | 2292.8         | 1620.4         | 0.001811  | -3.34         | D                      | -4.1        | D                      | -3.81       | D                      | -3.56       | D                      | -4.47       | D                      | -4.47       | D                      | -4.9        | D                      | -4.9        | D | -4.17 | D |
| 1418317_t1   | Lhx2      | 16870        | -3.9                           | transcription                                | 44.7        | 23.7        | 43.2        | 528.4          | 495.6          | 307.1          | 4.02E-04  | -3.03         | D                      | -3.4        | D                      | -3.36       | D                      | -4.04       | D                      | -4.45       | D                      | -3.69       | D                      | -4.21       | D                      | -5.01       | D | -3.94 | D |
| 1426658_t1   | Smc2      | 14211        | -3.86                          | DNA metabolic process                        | 286.6       | 296.9       | 27.47       | 4230.5         | 4038.8         | 4279.4         | 7.93E-07  | -3.86         | D                      | -3.88       | D                      | -3.85       | D                      | -3.97       | D                      | -3.91       | D                      | -4.01       | D                      | -3.85       | D                      | -3.76       | D | -3.82 | D |
| 1417450_t1   | Tacc3     | 21335        | -3.83                          | regulation of progression through cell cycle | 19.4        | 118.3       | 84.3        | 883.4          | 468.8          | 437.2          | 0.0039114 | -5.19         | D                      | -4.43       | D                      | -4.34       | D                      | -2.34       | D                      | -1.79       | D                      | -1.68       | D                      | -4.82       | D                      | -4.55       | D | -4.75 | D |
| 1448201_t1   | Spz2      | 20319        | -3.83                          | oogenesis                                    | 126.4       | 10.9        | 31.8        | 588.1          | 652.2          | 526.7          | 2.22E-04  | -1.87         | D                      | -2.16       | D                      | -1.98       | D                      | -5.2        | D                      | -5.58       | D                      | -4.95       | D                      | -4.52       | D                      | -4.49       | D | -3.71 | D |
| 1424128_t1   | Aurkb     | 20877        | -3.81                          | DNA methylation                              | 81.8        | 23.3        | 32.2        | 830.1          | 534.5          | 503.3          | 2.87E-04  | -2.33         | D                      | -2.35       | D                      | -2.36       | D                      | -4.24       | D                      | -4.49       | D                      | -4.48       | D                      | -4.56       | D                      | -5.16       | D | -4.36 | D |
| 1422513_t1   | Conf1     | 12449        | -3.79                          | regulation of progression through cell cycle | 196.1       | 35.1        | 11          | 625.4          | 901.6          | 880            | 0.002368  | -2.07         | D                      | -2.07       | D                      | -2.39       | D                      | -3.93       | D                      | -4.65       | D                      | -4.48       | D                      | -4.18       | D                      | -4.6        | D | -4.79 | D |
| 1452534_t1   | Hmgp2     | 433785       |                                |                                              |             |             |             |                |                |                |           |               |                        |             |                        |             |                        |             |                        |             |                        |             |                        |             |                        |             |   |       |   |

|              |             |        |       |                                                         |         |        |        |         |         |         |           |       |   |       |   |       |   |       |   |       |   |       |   |       |   |       |   |       |   |
|--------------|-------------|--------|-------|---------------------------------------------------------|---------|--------|--------|---------|---------|---------|-----------|-------|---|-------|---|-------|---|-------|---|-------|---|-------|---|-------|---|-------|---|-------|---|
| 1419838_a_at | Pk4         | 20873  | -2.78 |                                                         | 24.9    | 138.4  | 243.4  | 841.1   | 897.1   | 574.5   | 0.0057237 | -4.07 | D | -4.84 | D | -4.66 | D | -2.2  | D | -2.3  | D | -2.07 | D | -1.82 | D | -1.83 | D | -1.43 | D |
| 1433999_a_at | Bcl2l1      | 217578 | -2.77 | chromatin remodeling                                    | 199.2   | 367.9  | 1053.3 | 1143.4  | 1382.7  | 1025.9  | 0.0017926 | -2.6  | D | -2.33 | D | -2.52 | D | -1.86 | D | -2.22 | D | -1.76 | D | -3.77 | D | -3.47 | D |       |   |
| 1455956_a_at | Cond2       | 12444  | -2.77 | regulation of progression through cell cycle            | 10466.1 | 7977.7 | 6445.3 | 69833   | 66445.3 | 74602.5 | 1.43604   | -2.17 | D | -2.36 | D | -2.36 | D | -2.67 | D | -2.81 | D | -2.82 | D | -3.11 | D | -3.34 | D | -3.31 | D |
| 1412629_a_at | Slnbp1      | 20419  | -2.76 |                                                         | 129.1   | 32.3   | 63.3   | 1008.8  | 866.9   | 1963.3  | 1.90604   | -2.08 | D | -2.26 | D | -2.31 | D | -2.34 | D | -2.62 | D | -2.63 | D | -3.13 | D | -3.25 | D | -3.28 | D |
| 1422460_a_at | Mxdp1       | 56150  | -2.74 | mitotic sister chromatid segregation                    | 269.2   | 231.7  | 193.2  | 1428.4  | 1787.5  | 1465.9  | 3.62604   | -2.64 | D | -3.23 | D | -2.51 | D | -2.50 | D | -3.99 | D | -2.62 | D | -2.51 | D | -2.94 | D | -2.67 | D |
| 1436186_a_at | E2f8        | 108961 | -2.73 | regulation of progression through cell cycle            | 112     | 28.3   | 105.6  | 747.5   | 818.6   | 626.2   | 4.86504   | -1.96 | D | -2.03 | D | -1.81 | D | -3.7  | D | -4.18 | D | -4.14 | D | -1.77 | D | -2.47 | D | -2.49 | D |
| 1439301_a_at | Rau5f11     | 13963  | -2.73 |                                                         | 133.4   | 177    | 204.6  | 1120.5  | 1139.6  | 1472    | 7.61604   | -2.95 | D | -3.06 | D | -3.49 | D | -2.5  | D | -2.88 | D | -2.93 | D | -2.23 | D | -2.25 | D | -2.31 | D |
| 1427161_a_at | Carpf       | 108000 | -2.72 | G2 phase of mitotic cell cycle                          | 291.6   | 209.8  | 429    | 2019.3  | 2064.8  | 1709.7  | 2.28604   | -2.7  | D | -2.74 | D | -2.7  | D | -3.26 | D | -3.61 | D | -3.07 | D | -2.12 | D | -2.28 | D | -2.04 | D |
| 1422430_a_at | Flyg1f      | 69530  | -2.69 |                                                         | 32.5    | 40.4   | 100.2  | 427.1   | 473.8   | 361.9   | 7.12504   | -3.21 | D | -3.1  | D | -3.4  | D | -2.76 | D | -3.12 | D | -2.35 | D | -2.46 | D | -2.13 | D | -1.71 | D |
| 1416698_a_at | Oxlt1b      | 54124  | -2.68 | cell cycle                                              | 341.1   | 463    | 426    | 2539.6  | 2600.8  | 2562.9  | 5.24505   | -3.09 | D | -3    | D | -2.9  | D | -2.57 | D | -3.32 | D | -2.11 | D | -2.88 | D | -2.65 | D | -2.57 | D |
| 1417458_a_at | Ck2c        | 66197  | -2.68 | cytokinesis                                             | 227.8   | 174.5  | 166    | 1090.9  | 823     | 1147.3  | 0.0012292 | -2.45 | D | -2.14 | D | -2.44 | D | -3.2  | D | -3.82 | D | -3.15 | D | -2.94 | D | -2.41 | D | -2.6  | D |
| 1444257_a_at | Pv1f1       | 270598 | -2.68 |                                                         | 115.2   | 49.2   | 203.2  | 708.9   | 704     | 664.1   | 2.93604   | -2.58 | D | -2.52 | D | -2.49 | D | -3.89 | D | -3.36 | D | -3.79 | D | -1.95 | D | -2.02 | D | -1.56 | D |
| 1448710_a_at | Cux1f       | 12767  | -2.62 | entry of mitosis                                        | 595.5   | 426.3  | 440.7  | 2495    | 3147.4  | 2304.2  | 3.87604   | -2.2  | D | -2.44 | D | -2.85 | D | -2.89 | D | -3.97 | D | -2.68 | D | -2.62 | D | -2.91 | D | -2.76 | D |
| 1427275_a_at | Smc4        | 70099  | -2.61 | DNA metabolic process                                   | 397.9   | 735.6  | 1067.8 | 3584.8  | 3446    | 4367.5  | 8.72504   | -3.14 | D | -3.36 | D | -2.92 | D | -2.46 | D | -3.58 | D | -2.16 | D | -2.17 | D | -2.5  | D | -2.16 | D |
| 1438434_a_at | Arhgap11a   | 228482 | -2.6  | signal transduction                                     | 284.4   | 198.8  | 107    | 1408.1  | 1726.2  | 942.6   | 0.0074979 | -2.22 | D | -2.36 | D | -1.49 | D | -2.91 | D | -3.71 | D | -1.54 | D | -3.73 | D | -3.27 | D | -2.75 | D |
| 1458960_a_at | Alpm        | 12316  | -2.6  | cell cycle                                              | 142.2   | 176.6  | 105.2  | 1021.1  | 1397.8  | 1790.1  | 0.0039888 | -2.77 | D | -2.42 | D | -2.49 | D | -2.26 | D | -2.83 | D | -2.51 | D | -2.6  | D | -2.92 | D | -2.57 | D |
| 1438390_a_at | Ptp1f       | 30039  | -2.57 | DNA metabolic process                                   | 426.2   | 156.9  | 652.9  | 2726.6  | 2462.5  | 3061    | 4.82604   | -2.78 | D | -2.25 | D | -2.75 | D | -3.57 | D | -3.34 | D | -3.68 | D | -1.76 | D | -1.29 | D | -1.75 | D |
| 1428104_a_at | Tpx2        | 72119  | -2.55 | spindle assembly                                        | 93.8    | 88.7   | 232.7  | 1076.9  | 722.8   | 988.3   | 0.0024483 | -2.2  | D | -2.75 | D | -3.56 | D | -3.21 | D | -3.57 | D | -3.02 | D | -1.67 | D | -1.24 | D | -1.76 | D |
| 1433252_a_at |             |        | -2.54 |                                                         | 368.1   | 299    | 512.5  | 2349.8  | 2460.7  | 2712    | 6.54505   | -3.25 | D | -2.41 | D | -2.92 | D | -2.71 | D | -3.08 | D | -2.16 | D | -2.14 | D | -2.14 | D | -2.6  | D |
| 1441637_a_at | F7300476706 | 212377 | -2.54 |                                                         | 183.2   | 17.2   | 84.1   | 400.6   | 329.8   | 303.8   | 0.0063919 | -1.94 | D | -1.57 | D | -1.38 | D | -4.26 | D | -3.72 | D | -3.64 | D | -2.44 | D | -1.87 | D | -2.1  | D |
| 1417621_a_at | D17M656E-6  | 110566 | -2.52 |                                                         | 286.1   | 250.8  | 58.4   | 1367.3  | 1241.4  | 1080    | 8.76504   | -2.25 | D | -2.51 | D | -1.74 | D | -2.30 | D | -2.24 | D | -2.44 | D | -3.09 | D | -3.66 | D | -2.43 | D |
| 1430127_a_at | Cond2       | 12444  | -2.52 | regulation of progression through cell cycle            | 3193.3  | 1891   | 1758.5 | 11570.1 | 13798.8 | 10796.2 | 6.48604   | -2.1  | D | -2.34 | D | -1.98 | D | -2.6  | D | -3.81 | D | -2.46 | D | -2.65 | D | -2.86 | D | -2.61 | D |
| 1450862_a_at | Rau5f4      | 19966  | -2.5  | DNA repair                                              | 229.2   | 336.6  | 455.3  | 1154.3  | 1542.4  | 1712.5  | 0.0013939 | -2.87 | D | -2.88 | D | -3.04 | D | -2.28 | D | -3.22 | D | -2.38 | D | -2.16 | D | -2.38 | D | -2.53 | D |
| 1423774_a_at | Pfct        | 234468 | -2.48 | cytokinesis                                             | 109.6   | 180.4  | 215.4  | 911.1   | 951.6   | 1401    | 0.0034949 | -1.97 | D | -3.33 | D | -2.91 | D | -2.47 | D | -2.46 | D | -2.5  | D | -1.93 | D | -1.85 | D | -1.96 | D |
| 1448519_a_at | Tead2       | 21677  | -2.48 | transcription                                           | 217.5   | 107.3  | 100.6  | 942.1   | 812.5   | 748     | 5.39504   | -1.83 | D | -1.89 | D | -1.92 | D | -2.84 | D | -2.79 | D | -2.62 | D | -2.96 | D | -2.88 | D | -2.82 | D |
| 1436708_a_at | Mom4        | 12717  | -2.46 | DNA replication                                         | 319     | 240.8  | 120.1  | 1182.5  | 1365.7  | 1088.7  | 7.12504   | -2.08 | D | -2.36 | D | -1.78 | D | -2.24 | D | -2.39 | D | -2.04 | D | -3.29 | D | -3.26 | D | -2.66 | D |
| 1418334_a_at | Dna         | 27214  | -2.43 | DNA replication                                         | 257.8   | 269    | 288.2  | 1303.3  | 1406.3  | 900.8   | 0.0027980 | -2.49 | D | -2.65 | D | -2.3  | D | -2.63 | D | -2.59 | D | -2.18 | D | -2.57 | D | -2.55 | D | -1.89 | D |
| 1452242_a_at | Cap55       | 74107  | -2.42 | cell cycle                                              | 141.1   | 108.1  | 136.2  | 802.8   | 954.1   | 781.2   | 2.08604   | -2.19 | D | -2.44 | D | -2.62 | D | -2.78 | D | -2.86 | D | -2.87 | D | -2.47 | D | -2.26 | D | -2.07 | D |
| 1417457_a_at | Ck2c        | 66197  | -2.41 | cytokinesis                                             | 150.2   | 120.7  | 21.8   | 1080.3  | 1028.5  | 667     | 0.0051077 | -2.68 | D | -2.78 | D | -2.07 | D | -3.15 | D | -3.23 | D | -2.36 | D | -2.08 | D | -2.12 | D | -1.55 | D |
| 1417541_a_at | Hdk1        | 16201  | -2.38 | signal transduction                                     | 95.3    | 111.3  | 118.9  | 691.9   | 548.9   | 569.1   | 4.57604   | -2.22 | D | -2.49 | D | -2.82 | D | -2.4  | D | -2.35 | D | -2.25 | D | -2.43 | D | -2.01 | D | -2.29 | D |
| 1423947_a_at | Nkap2b      | 68209  | -2.37 | cell cycle                                              | 358.8   | 233.7  | 351.5  | 1742.6  | 1995.6  | 1302.6  | 0.0034979 | -1.92 | D | -2.22 | D | -1.8  | D | -2.9  | D | -2.97 | D | -2.87 | D | -2.12 | D | -2.62 | D | -2.14 | D |
| 1434767_a_at | C79407      | 217663 | -2.37 |                                                         | 229.2   | 181.2  | 342.9  | 1355.6  | 1511.4  | 1217.9  | 3.38604   | -2.62 | D | -2.83 | D | -2.37 | D | -2.48 | D | -2.72 | D | -2.22 | D | -2.1  | D | -2.32 | D | -1.79 | D |
| 1458873_a_at | Alpm        | 12316  | -2.36 | cell cycle                                              | 178.3   | 157.1  | 273.1  | 1234.9  | 1118.6  | 1068.8  | 6.28505   | -2.4  | D | -2.28 | D | -2.34 | D | -2.75 | D | -2.64 | D | -2.54 | D | -2.11 | D | -2.15 | D | -2.03 | D |
| 1417638_a_at | Rau5f10t    | 19892  | -2.32 | double-strand break repair via homologous recombination | 70.8    | 84.3   | 142.2  | 642.2   | 767.7   | 727.7   | 5.14505   | -3.03 | D | -3.67 | D | -2.88 | D | -2.2  | D | -2.14 | D | -2.47 | D | -1.44 | D | -1.62 | D | -1.47 | D |
| 1427276_a_at | Smc4        | 70099  | -2.32 | DNA metabolic process                                   | 973.8   | 1041.7 | 761.2  | 5399    | 5306    | 4886.6  | 1.78505   | -2.08 | D | -2.32 | D | -1.81 | D | -2.34 | D | -2.37 | D | -2.16 | D | -2.6  | D | -2.71 | D | -2.51 | D |
| 1417947_a_at | Pona        | 18838  | -2.31 | DNA replication                                         | 776.3   | 603.9  | 1758.5 | 3782.6  | 3780.3  | 3667.7  | 1.34506   | -2.28 | D | -2.19 | D | -2.31 | D | -2.38 | D | -2.49 | D | -2.45 | D | -2.29 | D | -2.24 | D | -2.12 | D |
| 1422814_a_at | Alpm        | 12316  | -2.31 | cell cycle                                              | 92.3    | 126.3  | 277.4  | 724.9   | 1100    | 741.4   | 0.0069164 | -2.53 | D | -3.31 | D | -2.79 | D | -2.5  | D | -3.09 | D | -2.27 | D | -0.9  | D | -1.77 | D | -1.2  | D |
| 1416830_a_at | Alpm        | 11658  | -2.28 | cell adhesion                                           | 356.3   | 536.5  | 797.1  | 2092.2  | 2131.6  | 2525.6  | 8.52604   | -2.81 | D | -2.73 | D | -2.84 | D | -2.21 | D | -3.09 | D | -2.24 | D | -1.62 | D | -1.98 | D | -1.98 | D |
| 1422731_a_at | Lmd1f       | 29066  | -2.27 |                                                         | 1654.6  | 957    | 892.2  | 4215.7  | 6917.4  | 5086    | 0.0072341 | -1.42 | D | -2.12 | D | -1.86 | D | -2.26 | D | -3.01 | D | -2.56 | D | -2.05 | D | -1.75 | D | -2.43 | D |
| 1452197_a_at | Smc4        | 70099  | -2.27 | DNA metabolic process                                   | 996.5   | 991.3  | 778.5  | 4440.1  | 5131.9  | 4131.3  | 2.79504   | -2.4  | D | -2.48 | D | -2.18 | D | -2.00 | D | -2.2  | D | -1.79 | D | -2.61 | D | -2.57 | D | -2.15 | D |
| 1415878_a_at | Rrm1f       | 20133  | -2.26 | DNA replication                                         | 557.3   | 513.9  | 599.8  | 2133.1  | 2273.2  | 2148.9  | 5.57506   | -2.39 | D | -2.18 | D | -2.12 | D | -2.29 | D | -2.41 | D | -2.22 | D | -2.25 | D | -2.33 | D | -2.19 | D |
| 1451358_a_at | Rangap1     | 26024  | -2.24 | cytokinesis                                             | 426     | 309.8  | 258.3  | 1589.5  | 1689.9  | 1157.8  | 0.0030017 | -2.19 | D | -2.27 | D | -1.94 | D | -2.25 | D | -2.39 | D | -1.88 | D | -2.48 | D | -2.63 | D | -2.15 | D |
| 1432361_a_at | Carpf       | 66336  | -2.23 |                                                         | 74      | 115.7  | 74.4   | 272.5   | 340.9   | 280.8   | 0.0012131 | -2.13 | D | -2.24 | D | -1.99 | D | -2.31 | D | -1.93 | D | -1.99 | D | -2.37 | D | -2.57 | D | -2.51 | D |
| 1442134_a_at | Pv1f1       | 270598 | -2.23 |                                                         | 117.6   | 400.5  | 178.3  | 1033.7  | 1031.9  | 1085.8  | 7.37504   | -     |   |       |   |       |   |       |   |       |   |       |   |       |   |       |   |       |   |

|           |            |        |       |                                                     |         |        |         |         |         |         |           |       |   |       |   |       |   |       |   |       |   |       |   |       |   |       |   |       |   |
|-----------|------------|--------|-------|-----------------------------------------------------|---------|--------|---------|---------|---------|---------|-----------|-------|---|-------|---|-------|---|-------|---|-------|---|-------|---|-------|---|-------|---|-------|---|
| 1447930_a | Bkaf1a     | 217578 | -1.76 | chromatin remodeling                                | 306.3   | 277.9  | 356.8   | 1036.4  | 1086.7  | 1100    | 1.46E-05  | -1.57 | D | -2.13 | D | -1.76 | D | -1.88 | D | -2.43 | D | -2.45 | D | -0.74 | D | -1.32 | D | -1.52 | D |
| 1456573_a | Nbr        | 18115  | -1.76 | ribonucleic acid metabolism                         | 283.4   | 286.9  | 336     | 1177.6  | 1463.8  | 924.8   | 0.0047963 | -2.17 | D | -1.76 | D | -1.81 | D | -1.97 | D | -1.77 | D | -1.67 | D | -0.74 | D | -1.63 | D | -1.48 | D |
| 1436292_a | Adk        | 11834  | -1.74 | protein phosphorylation                             | 501.8   | 369.8  | 160.8   | 1003.3  | 1112.5  | 807.1   | 0.0020966 | -1.16 | D | -1.41 | D | -1.23 | D | -1.39 | D | -1.56 | D | -1.58 | D | -2.25 | D | -2.62 | D | -2.47 | D |
| 1436270_a | LOC252094  | 19384  | -1.74 | regulation of progression through cell cycle        | 3051.4  | 3105.9 | 2903.8  | 19221.2 | 19210.8 | 9170.2  | 4.26E-05  | -1.71 | D | -1.72 | D | -1.86 | D | -1.76 | D | -1.17 | D | -1.73 | D | -1.83 | D | -1.78 | D | -1.76 | D |
| 1414836_a | Hs11h3ad   | 15267  | -1.72 | nucleosome assembly                                 | 984.2   | 906.1  | 993.5   | 3168.4  | 2374.9  | 3194.8  | 0.0018789 | -1.79 | D | -1.6  | D | -2.08 | D | -1.57 | D | -1.34 | D | -1.76 | D | -1.82 | D | -1.58 | D | -1.94 | D |
| 1425550_a | Isc11      | 69207  | -1.72 | metabolic process                                   | 1899    | 1508   | 1615.9  | 4825.9  | 6742.5  | 6424.4  | 0.0020207 | -1.3  | D | -1.68 | D | -1.96 | D | -1.83 | D | -1.92 | D | -1.86 | D | -1.66 | D | -1.89 | D | -1.96 | D |
| 1452241_a | Tobp1      | 235559 | -1.72 | DNA repair                                          | 244.4   | 217    | 383.5   | 781.6   | 1063.4  | 761     | 0.00857   | -1.76 | D | -2.07 | D | -1.77 | D | -1.88 | D | -2.05 | D | -1.66 | D | -1.37 | D | -1.76 | D | -1.19 | D |
| 1417450_a | Conr1      | 12443  | -1.71 | regulation of progression through cell cycle        | 632     | 781.8  | 620.5   | 1877.5  | 1970    | 1747.2  | 3.42E-04  | -1.39 | D | -1.63 | D | -1.8  | D | -1.37 | D | -1.42 | D | -1.34 | D | -2.22 | D | -2.29 | D | -2.11 | D |
| 1421237_a | Tempo      | 21917  | -1.71 | regulation of transcription                         | 318.4   | 392.9  | 237.6   | 865.6   | 1057.9  | 814.2   | 0.002326  | -1.55 | D | -1.36 | D | -1.52 | D | -1.5  | D | -1.42 | D | -1.27 | D | -2.19 | D | -2.24 | D | -2.36 | D |
| 1434410_a | BC043118   | 224273 | -1.7  |                                                     | 142.1   | 401.6  | 151     | 956     | 897.4   | 794.3   | 0.0075442 | -2.36 | D | -1.98 | D | -1.71 | D | -1.32 | D | -0.9  | D | -0.93 | D | -2.32 | D | -2.02 | D | -1.74 | D |
| 1451782_a | Slc29a1    | 63959  | -1.69 | transport                                           | 838.9   | 985.9  | 657.3   | 3272.5  | 2945.5  | 2718.8  | 3.25E-04  | -1.48 | D | -1.86 | D | -1.53 | D | -1.34 | D | -1.3  | D | -1.3  | D | -2.24 | D | -2.11 | D | -2.08 | D |
| 1454886_a | 643079022R | 381280 | -1.68 |                                                     | 353.6   | 350.3  | 409.8   | 1212.8  | 1489.2  | 1310    | 2.41E-04  | -1.72 | D | -1.89 | D | -1.33 | D | -1.98 | D | -1.93 | D | -1.68 | D | -1.53 | D | -1.82 | D | -1.25 | D |
| 1416746_a | H2afv      | 15070  | -1.67 | DNA damage checkpoint                               | 550.5   | 487.7  | 776.7   | 1894.3  | 2099.7  | 2102.8  | 3.13E-04  | -1.44 | D | -1.22 | D | -1.89 | D | -2.24 | D | -1.74 | D | -2.26 | D | -1.54 | D | -0.94 | D | -1.73 | D |
| 1415829_a | Ltr        | 98386  | -1.66 | nucleic acid binding                                | 475.7   | 589.3  | 398.1   | 1538.4  | 1827.2  | 1165    | 0.00868   | -1.66 | D | -2.02 | D | -1.51 | D | -1.4  | D | -1.77 | D | -1.26 | D | -1.63 | D | -2.13 | D | -1.47 | D |
| 1434878_a | LOC252094  | 19384  | -1.66 | regulation of progression through cell cycle        | 1947.7  | 2538.7 | 1973.2  | 6805.6  | 5987    | 5278.8  | 0.0012202 | -1.66 | D | -1.75 | D | -1.83 | D | -1.68 | D | -1.55 | D | -1.49 | D | -1.78 | D | -1.7  | D | -1.52 | D |
| 1438906_a | Ctcf       | 24876  | -1.66 | transport                                           | 960.9   | 876.3  | 930.6   | 2940.9  | 3375.8  | 3343.8  | 5.15E-05  | -1.59 | D | -1.71 | D | -1.61 | D | -1.74 | D | -1.85 | D | -1.62 | D | -1.58 | D | -1.67 | D | -1.38 | D |
| 1419254_a | MMS2       | 17768  | -1.64 | new carbon compound metabolic process               | 465.3   | 433.4  | 256.3   | 1115.6  | 1049.7  | 999.2   | 7.84E-04  | -1.37 | D | -1.48 | D | -1.85 | D | -1.52 | D | -1.44 | D | -1.37 | D | -2.09 | D | -2.14 | D | -1.8  | D |
| 1421951_a | Lhx1       | 16869  | -1.64 | endosome formation                                  | 3357.1  | 3193.7 | 2877.3  | 7655.5  | 10046.4 | 10058.1 | 9.71E-04  | -1.46 | D | -1.78 | D | -1.72 | D | -1.46 | D | -1.76 | D | -1.83 | D | -1.38 | D | -1.56 | D | -1.84 | D |
| 1435509_a | Cdk2ap1    | 13445  | -1.64 | cell cycle                                          | 2366.2  | 2193.5 | 1581    | 6488.4  | 7210.1  | 6180.7  | 3.13E-04  | -1.36 | D | -1.56 | D | -1.34 | D | -1.47 | D | -1.78 | D | -1.5  | D | -1.84 | D | -2.08 | D | -1.8  | D |
| 1448207_a | K2Da       | 19348  | -1.64 | transport                                           | 217.7   | 182.5  | 99.7    | 465.6   | 547.2   | 588.9   | 0.0015893 | -1.44 | D | -1.24 | D | -1.42 | D | -1.37 | D | -1.6  | D | -1.34 | D | -2.16 | D | -2.08 | D | -2.1  | D |
| 1445073_a |            |        | -1.63 |                                                     | 869.8   | 921.4  | 1210.9  | 2929.9  | 2029.5  | 2385.8  | 0.0024164 | -1.85 | D | -1.9  | D | -1.96 | D | -1.73 | D | -1.55 | D | -1.71 | D | -1.29 | D | -1.29 | D | -1.42 | D |
| 1433507_a | Hmg20      | 15331  | -1.61 | DNA packaging                                       | 10070.5 | 10225  | 10115.1 | 30366.2 | 32897.8 | 29165.7 | 4.62E-05  | -1.67 | D | -1.81 | D | -1.89 | D | -1.64 | D | -1.68 | D | -1.46 | D | -1.5  | D | -1.57 | D | -1.43 | D |
| 1456314_a | Cdk2ap1    | 13445  | -1.61 | cell cycle                                          | 3045.1  | 1937.5 | 1301.9  | 6284    | 8347.9  | 6889.6  | 0.0031937 | -1.24 | D | -1.53 | D | -1.28 | D | -1.38 | D | -1.67 | D | -1.39 | D | -1.79 | D | -2.24 | D | -2.01 | D |
| 1428612_a | Tipin      | 69131  | -1.6  |                                                     | 244.7   | 276.7  | 422.6   | 805.6   | 937.1   | 1133.3  | 0.0042259 | -1.69 | D | -1.84 | D | -2.42 | D | -1.61 | D | -1.57 | D | -1.58 | D | -1.21 | D | -1.01 | D | -1.46 | D |
| 1416214_a | Mom1       | 17217  | -1.58 | DNA replication                                     | 304.6   | 391.9  | 457.3   | 991.3   | 942     | 1075.7  | 4.73E-04  | -2.06 | D | -2.18 | D | -2.14 | D | -1.37 | D | -1.45 | D | -1.23 | D | -1.2  | D | -1.28 | D | -1.28 | D |
| 1436301_a | Mon7       | 17220  | -1.57 | DNA replication                                     | 302.4   | 193.3  | 311.7   | 514.1   | 952.3   | 818     | 3.44E-04  | -1.49 | D | -1.61 | D | -1.56 | D | -1.52 | D | -1.91 | D | -1.89 | D | -1.11 | D | -1.43 | D | -1.17 | D |
| 1434891_a | Pgfn       | 19221  | -1.57 | negative regulation of protein biosynthetic process | 264.3   | 404.4  | 419.1   | 1070.4  | 1351.4  | 688.9   | 0.0061471 | -1.39 | D | -1.63 | D | -1.88 | D | -1.73 | D | -1.91 | D | -1.55 | D | -1.27 | D | -1.42 | D | -1.41 | D |
| 1451456_a | 643079022R | 381280 | -1.57 |                                                     | 313.1   | 240.2  | 251.9   | 714.1   | 903.3   | 603.9   | 0.0063954 | -1.16 | D | -1.76 | D | -1.37 | D | -1.46 | D | -2.14 | D | -1.55 | D | -1.37 | D | -1.92 | D | -1.37 | D |
| 1417887_a | Timeless   | 21863  | -1.55 | transcription                                       | 171.4   | 274.4  | 242     | 929     | 844.5   | 793     | 2.33E-04  | -1.79 | D | -1.86 | D | -1.59 | D | -1.53 | D | -1.73 | D | -1.42 | D | -1.39 | D | -1.54 | D | -1.14 | D |
| 1427048_a | Smc        | 319757 | -1.55 | vinculin biosynthesis                               | 282.6   | 498.4  | 356.8   | 1098.4  | 1135.3  | 1449.4  | 0.0020316 | -2.22 | D | -2.03 | D | -2.03 | D | -1.11 | D | -1.26 | D | -1.68 | D | -1.29 | D | -1.19 | D | -1.38 | D |
| 1438977_a | LOC252094  | 19384  | -1.55 | regulation of progression through cell cycle        | 2260.4  | 2058.4 | 2147.7  | 6950.4  | 6984.6  | 6967.7  | 1.47E-04  | -1.62 | D | -1.37 | D | -1.34 | D | -1.86 | D | -1.67 | D | -1.56 | D | -1.67 | D | -1.42 | D | -1.41 | D |
| 1423876_a | Usp1       | 230484 | -1.53 | ubiquitin-protein ligase catalytic process          | 746.1   | 840    | 273.3   | 1904.8  | 1658.8  | 1995    | 0.0025751 | -1.31 | D | -1.45 | D | -1.24 | D | -1.21 | D | -1.13 | D | -0.9  | D | -2.4  | D | -2.15 | D | -2.01 | D |
| 1427863_a | Hs11h3ad   | 31149  | -1.53 | nucleosome assembly                                 | 460.7   | 844.2  | 800.1   | 3286.5  | 2807.7  | 2165.5  | 0.0048199 | -2.1  | D | -1.18 | D | -1.46 | D | -1.76 | D | -1.52 | D | -1.37 | D | -1.92 | D | -1.28 | D | -1.18 | D |
| 1434331_a | LOC252094  | 19384  | -1.53 |                                                     | 781.5   | 762.7  | 674.3   | 2462.2  | 1947.7  | 3158.1  | 0.0099911 | -1.54 | D | -1.16 | D | -1.14 | D | -1.79 | D | -1.55 | D | -1.61 | D | -1.71 | D | -1.6  | D | -1.63 | D |
| 1436959_a | Nef        | 56876  | -1.53 |                                                     | 270.9   | 231.8  | 287.2   | 678.4   | 792.2   | 963.3   | 0.0041881 | -1.64 | D | -1.15 | D | -1.23 | D | -1.72 | D | -1.84 | D | -2.5  | D | -1.17 | D | -1.37 | D | -1.59 | D |
| 1441677_a | Snca       | 70099  | -1.52 | DNA metabolic process                               | 238.5   | 284.3  | 460.8   | 988     | 759.5   | 1071.8  | 0.00699   | -1.24 | D | -1.07 | D | -1.49 | D | -1.58 | D | -1.28 | D | -1.8  | D | -1.66 | D | -1.38 | D | -1.84 | D |
| 1451346_a | Mhp        | 68002  | -1.52 | nucleotide and nucleic acid metabolic process       | 431.7   | 362    | 374.4   | 1008.3  | 1218.4  | 792.1   | 0.007827  | -1.62 | D | -1.92 | D | -1.16 | D | -1.23 | D | -2.01 | D | -1.54 | D | -1.35 | D | -1.84 | D | -1.01 | D |
| 1460354_a | Myp13      | 68037  | -1.52 | transcription                                       | 228.6   | 205.9  | 172.5   | 628.2   | 563.5   | 528.8   | 3.72E-04  | -1.16 | D | -1.14 | D | -1.23 | D | -1.47 | D | -1.15 | D | -1.47 | D | -1.63 | D | -1.07 | D | -2.13 | D |
| 1459388_a |            |        | -1.51 |                                                     | 597     | 609.6  | 698.4   | 1770.8  | 1327.9  | 1962.6  | 0.0051605 | -1.47 | D | -1.12 | D | -1.47 | D | -1.7  | D | -1.42 | D | -1.49 | D | -1.51 | D | -1.21 | D | -1.81 | D |
| 1424762_a | Phf17      | 264244 | -1.5  | transcription                                       | 889.5   | 927.7  | 1351.2  | 2081.9  | 3333.1  | 2803.8  | 0.0070917 | -1.5  | D | -1.88 | D | -1.98 | D | -1.28 | D | -1.83 | D | -1.57 | D | -0.85 | D | -1.41 | D | -1.16 | D |
| 1421883_a | Elav2      | 15999  | -1.49 |                                                     | 2349.3  | 1940.1 | 1670.9  | 4499.3  | 5505.4  | 4355.6  | 0.0024479 | -1.44 | D | -1.58 | D | -1.48 | D | -1.56 | D | -1.65 | D | -1.59 | D | -1.29 | D | -1.4  | D | -1.43 | D |
| 1435959_a | LOC252094  | 19384  | -1.49 | regulation of progression through cell cycle        | 3664.2  | 3342.5 | 3176.7  | 8999    | 8891.9  | 8349.3  | 2.27E-05  | -1.42 | D | -1.25 | D | -1.31 | D | -1.61 | D | -1.49 | D | -1.58 | D | -1.81 | D | -1.57 | D | -1.54 | D |
| 1456513_a | EM3        | 13993  | -1.49 | transcription                                       | 380.7   | 708.6  | 813.9   | 1988.2  | 1382    | 1674.9  | 0.0028265 | -1.93 | D | -1.36 | D | -1.78 | D | -1.78 | D | -1.42 | D | -1.52 | D | -1.18 | D | -0.75 | D | -1.31 | D |
| 1415031_a | Mon7       | 17220  | -1.48 | DNA replication                                     | 5       |        |         |         |         |         |           |       |   |       |   |       |   |       |   |       |   |       |   |       |   |       |   |       |   |

|           |              |        |       |                                                           |         |         |         |         |         |         |           |       |   |       |   |       |   |       |   |       |   |       |   |       |   |       |   |       |   |
|-----------|--------------|--------|-------|-----------------------------------------------------------|---------|---------|---------|---------|---------|---------|-----------|-------|---|-------|---|-------|---|-------|---|-------|---|-------|---|-------|---|-------|---|-------|---|
| 1437179_1 | LOC71598     | 51869  | -1.23 | response to DNA damage stimulus                           | 1154.4  | 1446.7  | 1020.7  | 2718.5  | 2019.3  | 2370.1  | 0.0081252 | -1.46 | D | -1.02 | D | -1.35 | D | -1.25 | D | -0.9  | D | -0.96 | D | -1.53 | D | -1.13 | D | -1.47 | D |
| 1434776_1 | Plecl3       | 93742  | -1.21 | cell cycle                                                | 424.2   | 337.3   | 368.4   | 983.9   | 1126.4  | 1136.5  | 2.26E-04  | -1.19 | D | -1.1  | D | -1.34 | D | -1.17 | D | -0.35 | D | -1.15 | D | -1.17 | D | -1.32 | D | -1.11 | D |
| 1457806_1 | Dock1        | 330662 | -1.21 | electron transport                                        | 1286.9  | 1615.3  | 1186.8  | 2584.7  | 3603.8  | 2814.2  | 0.0090759 | -1.1  | D | -1.36 | D | -1.21 | D | -0.9  | D | -1.29 | D | -0.94 | D | -1.16 | D | -1.79 | D | -1.21 | D |
| 1425263_1 | Mtp          | 17196  | -1.2  | myelination                                               | 1130.6  | 1269.6  | 1171.9  | 2737.5  | 2889.2  | 2461.4  | 3.40E-04  | -0.89 | D | -1.42 | D | -1.16 | D | -1.07 | D | -1.62 | D | -1.45 | D | -0.95 | D | -1.31 | D | -0.95 | D |
| 1415914_1 | Hypab        | 16384  | -1.19 | pathway to meiosis/meiosis transition                     | 11437   | 10805.5 | 10294   | 25224.4 | 26186   | 23402.4 | 6.75E-05  | -0.97 | D | -1.22 | D | -1.08 | D | -1.12 | D | -1.29 | D | -1.13 | D | -1.25 | D | -1.38 | D | -1.24 | D |
| 1458632_1 | Bcl11a       | 14025  | -1.19 | transcription                                             | 417.1   | 341.2   | 390.4   | 750.7   | 619.6   | 721.5   | 0.0202082 | -1    | D | -0.81 | D | -1.42 | D | -1.22 | D | -1.7  | D | -1.94 | D | -0.92 | D | -1.15 | D | -1.18 | D |
| 1460716_1 | Cdkb         | 12400  | -1.19 | cell division                                             | 1029.4  | 1231.3  | 867.4   | 2510.5  | 2585.9  | 2518.9  | 1.58E-04  | -1.39 | D | -1.26 | D | -1.42 | D | -1.15 | D | -0.97 | D | -1.16 | D | -1.27 | D | -1.08 | D | -1.04 | D |
| 1420895_1 | Tgfb1        | 21812  | -1.18 | cellular development                                      | 523.5   | 517.5   | 457.9   | 1014    | 1195.8  | 1064.5  | 5.23E-04  | -1.02 | D | -1.28 | D | -1.11 | D | -1.16 | D | -1.66 | D | -1.37 | D | -0.91 | D | -1.35 | D | -0.77 | D |
| 1425045_1 | Hmgp1        | 15289  | -1.18 | DNA packaging                                             | 8396.2  | 10744.7 | 10644.1 | 22235.2 | 22169   | 22576.3 | 1.28E-04  | -1.4  | D | -1.42 | D | -1.35 | D | -1.07 | D | -1.06 | D | -0.99 | D | -1.13 | D | -1.16 | D | -1.1  | D |
| 1428349_1 | Ekb3         | 13393  | -1.17 | transcription                                             | 12226.3 | 13395   | 12568.8 | 23434.6 | 25311.3 | 22024.2 | 4.18E-04  | -1.17 | D | -1.36 | D | -1.15 | D | -1    | D | -1.23 | D | -1    | D | -1.12 | D | -1.34 | D | -1.14 | D |
| 1432152_1 | 281010H47R6  | 70433  | -1.17 | regulation of gene expression through cell cycle          | 946.5   | 1173.7  | 891     | 1975    | 2410.1  | 2019.8  | 0.0028441 | -1.09 | D | -1.5  | D | -1.1  | D | -0.82 | D | -1.12 | D | -1.07 | D | -1.1  | D | -1.44 | D | -1.27 | D |
| 1450914_1 | Pap114b      | 18038  | -1.16 | RNA processing                                            | 1215.9  | 1120.2  | 1187.9  | 2970    | 2723.4  | 3011.7  | 5.24E-05  | -0.93 | D | -0.72 | D | -1.04 | D | -1.19 | D | -1.27 | D | -1.41 | D | -1.22 | D | -1.24 | D | -1.43 | D |
| 1456664_1 | EG66508      | 637038 | -1.16 | RNA processing                                            | 3104.1  | 2368.4  | 1805.3  | 9435.9  | 5261.8  | 4806.6  | 0.0203489 | -1.13 | D | -1.06 | D | -0.86 | D | -1.2  | D | -1.12 | D | -0.84 | D | -1.54 | D | -1.45 | D | -1.21 | D |
| 1456377_1 | Linc2        | 832309 | -1.15 | cell cycle                                                | 603.2   | 714.1   | 453.1   | 1135.6  | 1338    | 1073.8  | 0.0079795 | -1.54 | D | -1.42 | D | -1.15 | D | -0.8  | D | -1.12 | D | -0.53 | D | -1.08 | D | -1.44 | D | -1.23 | D |
| 1416105_1 | Nrc1         | 18115  | -1.14 | electron transport                                        | 343.4   | 371.8   | 507     | 886.7   | 994.7   | 1007    | 0.0019425 | -1.16 | D | -1.37 | D | -1.28 | D | -1.28 | D | -1.45 | D | -1.46 | D | -0.57 | D | -0.85 | D | -0.81 | D |
| 1431324_1 | Ctcf         | 24876  | -1.14 | transcription                                             | 2068.7  | 2193.2  | 1681.6  | 4382.4  | 3642.2  | 3900.7  | 0.0018813 | -1.19 | D | -1.07 | D | -1.33 | D | -1.07 | D | -0.78 | D | -0.88 | D | -1.72 | D | -1.31 | D | -1.4  | D |
| 1448729_1 | 4-Spp        | 19352  | -1.14 | cell cycle                                                | 765.6   | 743.4   | 690.3   | 1674.4  | 1976.6  | 1940    | 1.91E-04  | -1    | D | -1.01 | D | -1.11 | D | -0.99 | D | -1.16 | D | -1.15 | D | -1.22 | D | -1.22 | D | -1.37 | D |
| 142281    | Dinet1       | 13433  | -1.13 | DNA methylation                                           | 583.7   | 736.4   | 655.3   | 1486    | 1629.7  | 1638.7  | 1.52E-04  | -1.31 | D | -1.4  | D | -1.58 | D | -0.8  | D | -1.15 | D | -1.07 | D | -0.7  | D | -1    | D | -1.15 | D |
| 1425784_1 | Igfbp        | 16410  | -1.13 | angiogenesis                                              | 530.1   | 554.5   | 584.7   | 1350.9  | 1153.3  | 1226.8  | 3.20E-04  | -1.35 | D | -1.23 | D | -1.52 | D | -1.21 | D | -0.93 | D | -1.1  | D | -1    | D | -0.87 | D | -0.95 | D |
| 1426209_1 | Plagl1       | 22634  | -1.12 | positive regulation of transcription by RNA polymerase II | 3501    | 3506.7  | 2873.3  | 7648.6  | 7431.8  | 5733.9  | 0.0050079 | -1.09 | D | -1.2  | D | -0.82 | D | -1.16 | D | -1.15 | D | -1.03 | D | -1.17 | D | -1.38 | D | -1.03 | D |
| 1434880_1 | Ehfl         | 14011  | -1.12 | regulation of gene expression through cell cycle          | 1113.4  | 914     | 968.2   | 1769.1  | 2519.4  | 2216    | 0.0069163 | -0.84 | D | -1.34 | D | -1.21 | D | -0.91 | D | -1.53 | D | -1.26 | D | -0.61 | D | -1.11 | D | -1.26 | D |
| 1435324_1 | Hmgp1        | 15289  | -1.12 | DNA packaging                                             | 8716.3  | 7466.1  | 7919.6  | 17432.3 | 16921.5 | 16478.4 | 4.00E-05  | -1.04 | D | -1.05 | D | -1.16 | D | -1.16 | D | -1.17 | D | -1.17 | D | -1.12 | D | -1.11 | D | -1.12 | D |
| 1455897_1 | Hmgp1        | 15312  | -1.12 | pyrimidine dimer repair via nucleotide excision repair    | 12049.2 | 12219.1 | 7839.5  | 22434.3 | 24463.2 | 21400.9 | 0.0019714 | -0.88 | D | -1    | D | -0.83 | D | -0.96 | D | -1.05 | D | -0.86 | D | -1.52 | D | -1.59 | D | -1.42 | D |
| 1426895_1 | Cdk2ap1      | 13345  | -1.11 | cell cycle                                                | 3084.5  | 3800.4  | 3559    | 6786    | 6723.5  | 6395.3  | 0.002019  | -0.91 | D | -1    | D | -1.34 | D | -1.09 | D | -0.97 | D | -1.42 | D | -1    | D | -0.97 | D | -1.31 | D |
| 1418180_1 | Spt          | 20683  | -1.11 | transcription                                             | 11838.1 | 11461.6 | 11980   | 24401   | 24109.6 | 26847.8 | 1.07E-04  | -1.01 | D | -1.07 | D | -1.34 | D | -1.03 | D | -1.05 | D | -1.35 | D | -0.86 | D | -1    | D | -1.14 | D |
| 1419864_1 | Hsf1         | 15191  | -1.11 | cellular process                                          | 1288    | 1473.7  | 1568.8  | 3079.4  | 3373.4  | 3208.4  | 1.31E-04  | -1.12 | D | -1.2  | D | -1.12 | D | -1.08 | D | -1.22 | D | -1.13 | D | -0.99 | D | -1.12 | D | -0.95 | D |
| 1423440_1 | Ctcf         | 12967  | -1.11 | regulation of gene expression through cell cycle          | 434.6   | 367.5   | 302.8   | 807.2   | 1060.3  | 1031    | 0.0044963 | -0.86 | D | -1.02 | D | -1.02 | D | -1.26 | D | -1.52 | D | -1.42 | D | -0.9  | D | -0.89 | D | -0.98 | D |
| 1454464_1 |              |        | -1.09 |                                                           | 1732.8  | 1671.4  | 2045.7  | 3497.6  | 4657.4  | 3423.1  | 0.0080095 | -1.1  | D | -1.53 | D | -1.1  | D | -0.89 | D | -1.27 | D | -1.02 | D | -0.88 | D | -1.27 | D | -0.78 | D |
| 1460168_1 | Sfp1         | 20377  | -1.09 | mRNA processing                                           | 665.5   | 600.8   | 1100.9  | 1494.4  | 1721.4  | 1500    | 2.58E-04  | -1.2  | D | -1.49 | D | -1.31 | D | -1.03 | D | -1.31 | D | -1.13 | D | -0.68 | D | -0.86 | D | -0.77 | D |
| 1426209_1 | H2afv        | 77005  | -1.08 | nucleosome assembly                                       | 1133.1  | 769.9   | 969.5   | 1853.9  | 1805.8  | 2122    | 0.0025264 | -0.92 | D | -0.92 | D | -0.93 | D | -1.37 | D | -1.72 | D | -1.19 | D | -0.96 | D | -0.91 | D | -0.78 | D |
| 1451356_1 | Aap32a       | 66471  | -1.08 | pathway to meiosis/meiosis transition                     | 1109.5  | 753.3   | 816.5   | 1676.4  | 1661.3  | 1632    | 0.0208903 | -1.05 | D | -1.16 | D | -0.97 | D | -1.18 | D | -0.33 | D | -1.05 | D | -1.03 | D | -1.08 | D | -0.89 | D |
| 1455855_1 | Hypab        | 15384  | -1.08 | pathway to meiosis/meiosis transition                     | 35004.8 | 30388.4 | 30621   | 59583   | 65063.5 | 68981.6 | 4.73E-04  | -0.97 | D | -1.16 | D | -1.07 | D | -1.07 | D | -1.22 | D | -1.06 | D | -1    | D | -1.18 | D | -0.99 | D |
| 1423421_1 | Auk5d9       | 56503  | -1.07 | regulation of transcription by RNA polymerase II          | 791.6   | 875.8   | 853.8   | 1498.3  | 1809.4  | 1348.5  | 0.0067224 | -1.11 | D | -1.31 | D | -0.85 | D | -0.89 | D | -1.24 | D | -1.1  | D | -0.87 | D | -1.26 | D | -1    | D |
| 1424304_1 | Salm         | 114679 | -1.07 | regulation of gene expression through cell cycle          | 1084.4  | 916     | 805.3   | 1774.2  | 1727.6  | 1764    | 5.53E-04  | -1.09 | D | -0.85 | D | -0.8  | D | -1.1  | D | -1.01 | D | -1.09 | D | -1.22 | D | -1.2  | D | -1.31 | D |
| 1438940_1 | Hmgp1        | 15312  | -1.07 | pyrimidine dimer repair via nucleotide excision repair    | 16042.1 | 15335.3 | 10787.9 | 30212   | 30394.1 | 28117.4 | 0.0101075 | -0.81 | D | -0.93 | D | -0.77 | D | -0.94 | D | -1.02 | D | -0.96 | D | -1.34 | D | -1.53 | D | -1.37 | D |
| 1426406_1 | Satf8        | 67666  | -1.06 | chromatin modification                                    | 1379.9  | 1502.3  | 1320.9  | 2381.1  | 2781.2  | 3440.4  | 0.0049432 | -0.8  | D | -0.95 | D | -1.14 | D | -0.86 | D | -1.16 | D | -1.36 | D | -0.84 | D | -1.13 | D | -1.31 | D |
| 1433519_1 | Nuclek1      | 98415  | -1.06 | transcription                                             | 3667.8  | 5483.6  | 4197.6  | 10816.4 | 9193.8  | 8876.8  | 0.0030314 | -0.93 | D | -1.33 | D | -0.78 | D | -0.93 | D | -1.3  | D | -0.77 | D | -1.2  | D | -1.36 | D | -0.91 | D |
| 1438820_1 | Bbx          | 70508  | -1.05 | transcription                                             | 1120.2  | 1016    | 1102    | 1977.4  | 2061.8  | 2129.8  | 9.95E-05  | -0.95 | D | -0.81 | D | -1.11 | D | -1.07 | D | -1.19 | D | -1.2  | D | -1.03 | D | -0.97 | D | -1.15 | D |
| 1451920_1 | Rfc1         | 19687  | -1.05 | DNA replication                                           | 855.8   | 912.3   | 1099.5  | 1671.2  | 1762    | 1821.3  | 7.46E-04  | -1.07 | D | -1.06 | D | -1.31 | D | -1.19 | D | -1.09 | D | -1.27 | D | -0.77 | D | -0.77 | D | -0.86 | D |
| 1458838_1 | Bblt11       | 74007  | -1.05 | regulation of transcription by RNA polymerase II          | 331.5   | 302.7   | 387.8   | 809.6   | 735     | 723.9   | 0.0077916 | -1.25 | D | -1.33 | D | -1.52 | D | -0.89 | D | -0.93 | D | -1.35 | D | -0.71 | D | -0.66 | D | -0.82 | D |
| 1429468_1 | 2410127L17R6 | 626107 | -1.04 |                                                           | 2415.5  | 3026.9  | 3099.5  | 7039.8  | 7526.5  | 7637.6  | 8.52E-05  | -1.21 | D | -1.23 | D | -1.25 | D | -1.03 | D | -1.2  | D | -1.17 | D | -0.86 | D | -0.8  | D | -0.77 | D |
| 1426514_1 | 4631426L05R6 | 77950  | -1.03 | hemostatic process                                        | 1170.3  | 1312.7  | 1413.6  | 2696.1  | 2400    | 2507.1  | 3.80E-04  | -1.11 | D | -1.01 | D | -1.24 | D | -1.02 | D | -1.02 | D | -1    | D | -0.81 | D | -1.01 | D | -1.02 | D |
| 1416726_1 | Uba2a        | 77891  | -1.02 | protein modification process                              | 1743.3  | 1401.4  | 1363.1  | 3673.4  | 3344.8  | 3773    | 2.92E-04  | -1.11 | D | -0.9  | D | -0.97 | D | -1.07 | D | -0    |   |       |   |       |   |       |   |       |   |
